# Supplementary material
Source: PubMed Central journal article supplement (PMC8456979)
Supplement: NIHMS1739801-supplement-Supplementary_Material.pdf [file NIHMS1739801-supplement-Supplementary_Material.pdf]

## **Supplementary Information**

**Authors:** Alexandra Crowe, Wei Zheng, Jonathan Miller, Sonia Pahwa, Khondoker Alam, Kar-Ming Fung, Erin Rubin, Feng Yin, Kai Ding, and Wei Yue

**Title:** Characterization of plasma membrane localization and phosphorylation status of organic anion transporting polypeptide (OATP) 1B1 c.521 T>C nonsynonymous single-nucleotide polymorphism

**Journal:** Pharmaceutical Research

**Table S I. Demographics, diagnosis and genotype of c. 521 T>C and c.388 A>G and haplotype of liver donors (\*, normal liver tissues as described in the methods)**

| Subject # | Gender | Age | c.521 T>C | c.388 A>G | Haplotype          | Diagnosis                                          |
|-----------|--------|-----|-----------|-----------|--------------------|----------------------------------------------------|
| 1*        | M      | 21  | TC        | AG        | *1A/*15 or *1B/*5  | Gunshot wounds (GSW) benign liver parenchyma       |
| 2         | F      | 52  | TT        | AA        | *1A/*1A            | Metastatic breast carcinoma                        |
| 3         | F      | 81  | TC        | AG        | *1A/*15 or *1B/*15 | Metastatic colonic adenocarcinoma                  |
| 4         | M      | 61  | TT        | GG        | *1B/*1B            | Metastatic colonic adenocarcinoma                  |
| 5         | F      | 56  | TT        | GG        | *1B/*1B            | Pseudocyst                                         |
| 6         | F      | 61  | TT        | AA        | *1A/*1A            | Metastatic colonic adenocarcinoma, Cirrhotic liver |
| 7         | M      | 39  | TT        | AA        | *1A/*1A            | Metastatic colonic adenocarcinoma                  |
| 8         | F      | 72  | TT        | AA        | *1A/*1A            | Hepatocellular carcinoma                           |
| 9*        | M      | 34  | TT        | AA        | *1A/*1A            | Steatohepatitis (no fibrosis)                      |
| 10*       | M      | 65  | TT        | GG        | *1B/*1B            | GSW benign liver parenchyma                        |
| 11        | F      | 75  | TT        | AG        | *1A/*1B            | Intrahepatic cholangiocarcinoma                    |
| 12        | F      | 56  | TC        | AG        | *1A/*15 or *1B/*5  | Cavernous hemangioma                               |
| 13        | F      | 52  | TT        | GG        | *1B/*1B            | Hepatocellular carcinoma, Cirrhotic liver          |
| 14        | M      | 60  | TT        | AG        | *1A/*1B            | Hepatocellular carcinoma, Cirrhotic Liver          |
| 15        | M      | 64  | TC        | AG        | *1A/*15 or *1B/*5  | Metastatic colonic adenocarcinoma                  |
| 16        | F      | 68  | TC        | AA        | *1A/*5             | Intrahepatic cholangiocarcinoma                    |
| 17        | M      | 69  | TT        | AG        | *1A/*1B            | Intrahepatic cholangiocarcinoma                    |
| 18        | F      | 48  | TC        | AG        | *1A/*15 or *1B/*5  | Intrahepatic cholangiocarcinoma                    |
| 19        | F      | 37  | TT        | AG        | *1A/*1B            | Hepatic adenoma                                    |
| 20        | F      | 49  | TT        | AG        | *1A/*1B            | Hepatocellular carcinoma, Cirrhotic Liver          |
| 21        | F      | 28  | TT        | AG        | *1A/*1B            | Cavernous hemangioma                               |
| 22*       | F      | 53  | TT        | GG        | *1A/*1A            | Hepatic adenoma                                    |
| 23        | M      | 66  | TT        | AA        | *1B/*1B            | Intrahepatic cholangiocarcinoma                    |
| 24        | F      | 53  | TC        | AG        | *1A/*15 or *1B/*5  | Metastatic breast carcinoma                        |
| 25        | F      | 38  | TT        | AG        | *1A/*1B            | Hepatobiliary cystadenoma mucinous cystic neoplasm |
| 26        | M      | 57  | TT        | AA        | *1A/*1A            | Metastatic neuroendocrine carcinoma                |
| 27        | F      | 73  | TC        | GG        | *1B/*15            | Metastatic colonic adenocarcinoma                  |
| 28        | F      | 59  | TT        | AA        | *1A/*1A            | Cavernous hemangioma                               |
| 29        | M      | 81  | TC        | AA        | *1A/*5             | Metastatic colonic adenocarcinoma                  |
| 30*       | M      | 21  | TC        | AA        | *1A/*5             | GSW benign liver parenchyma                        |
| 31*       | M      | 32  | TC        | GG        | *1B/*15            | GSW benign liver parenchyma                        |
| 32        | M      | 62  | TT        | AA        | *1A/*1A            | Intrahepatic cholangiocarcinoma                    |
| 33        | M      | 52  | TT        | GG        | *1B/*1B            | Hepatocellular carcinoma, Cirrhotic Liver          |
| 34*       | M      | 31  | TT        | AG        | *1A/*1B            | GSW benign liver parenchyma with steatosis         |
| 35        | M      | 55  | TC        | GG        | *1B/*15            | Metastatic colonic adenocarcinoma                  |



|     |   |    |    |    |                   |                                                         |
|-----|---|----|----|----|-------------------|---------------------------------------------------------|
| 36  | F | 48 | TT | GG | *1B/*1B           | Metastatic endometroid adenocarcinoma                   |
| 37* | M | 17 | TC | AA | *1A/*5            | GSW benign liver parenchyma                             |
| 38  | M | 60 | TT | AA | *1A/*1A           | Metastatic colonic adenocarcinoma, Cirrhotic Liver      |
| 39  | M | 61 | TT | AG | *1a/*1b           | Cavernous hemangioma                                    |
| 40  | F | 83 | TC | AG | *1A/*15 or *1B/*5 | Metastatic colonic adenocarcinoma                       |
| 41  | M | 61 | CC | AG | *5/*15            | Metastatic neuroendocrine carcinoma                     |
| 42  | M | 57 | TT | AA | *1A/*1A           | Hepatocellular carcinoma                                |
| 43  | F | 41 | TT | AA | *1A/*1A           | Chronic hepatitis C                                     |
| 44  | F | 54 | TC | AG | *1A/*15 or *1B/*5 | Chronic hepatitis C                                     |
| 45  | M | 55 | TT | AG | *1A/*1B           | Chronic hepatitis C                                     |
| 46  | M | 61 | TT | AG | *1A/*1B           | Chronic hepatitis C                                     |
| 47  | M | 55 | TT | AA | *1A/*1A           | Chronic hepatitis C                                     |
| 48  | F | 22 | TT | AG | *1A/*1B           | Chronic hepatitis C                                     |
| 49  | M | 61 | TC | AG | *1A/*15 or *1B/*5 | Chronic hepatitis C                                     |
| 50  | F | 48 | TT | AG | *1A/*1B           | Chronic hepatitis C                                     |
| 51  | M | 61 | TT | GG | *1B/*1B           | Chronic hepatitis C                                     |
| 52  | F | 54 | TT | AA | *1A/*1A           | Chronic hepatitis C                                     |
| 53  | F | 32 | TT | GG | *1B/*1B           | Chronic hepatitis C                                     |
| 54  | M | 60 | TT | AG | *1A/*1B           | Chronic hepatitis C                                     |
| 55  | F | 63 | TT | GG | *1B/*1B           | Chronic hepatitis C                                     |
| 56  | F | 16 | TC | GG | *1B/*15           | NASH, Diabetes mellitus type 2                          |
| 57  | F | 50 | TC | GG | *1B/*15           | NASH, Diabetes mellitus type 2                          |
| 58  | F | 55 | CC | AG | *5/*15            | Steatohepatitis; borderline diabetes                    |
| 59  | F | 41 | TC | AA | *1A/*5            | Steatohepatitis, Diabetes mellitus type 2               |
| 60  | M | 48 | TT | AA | *1A/*1A           | Steatohepatitis, Diabetes mellitus type 2, dyslipidemia |
| 61  | M | 52 | TT | AA | *1A/*1A           | Steatohepatitis, Diabetes mellitus type 2               |
| 62  | F | 56 | TT | AG | *1A/*1B           | Steatohepatitis, Diabetes mellitus type 2               |
| 63  | F | 27 | TC | AG | *1A/*15 or *1B/*5 | NASH, Diabetes mellitus type 2                          |
| 64  | F | 41 | TT | AG | *1A/*1B           | Steatohepatitis, Diabetes mellitus type 2               |
| 65  | M | 50 | TC | GG | *1B/*15           | Steatohepatitis, Diabetes mellitus type 2, dyslipidemia |
| 66  | M | 33 | TC | AG | *1A/*15 or *1B/*5 | Steatohepatitis, Diabetes mellitus type 2               |
| 67  | F | 34 | TT | AA | *1A/*1A           | Steatohepatitis, Diabetes mellitus type 2, dyslipidemia |
| 68  | F | 53 | TT | AG | *1A/*1B           | Steatohepatitis, Diabetes mellitus type 2               |
| 69  | F | 50 | TC | GG | *1B/*15           | Steatohepatitis, Diabetes mellitus type 2, dyslipidemia |
| 70  | M | 61 | TT | AA | *1A/*1A           | Steatohepatitis, hypertension, GERD                     |
| 71  | M | 61 | TT | GG | *1B/*1B           | Steatohepatitis, borderline diabetes, GERD              |
| 72  | M | 21 | TT | AA | *1A/*1A           | Steatohepatitis, Diabetes mellitus type 1               |
| 73  | F | 65 | TT | AG | *1A/*1B           | Steatohepatitis, symptomatic cholelithiasis             |
| 74  | M | 42 | TT | AG | *1A/*1B           | Steatohepatitis, ventral incisional hernia              |

|    |   |    |    |    |         |                                                         |
|----|---|----|----|----|---------|---------------------------------------------------------|
| 75 | M | 47 | TT | GG | *1B/*1B | Steatohepatitis, Diabetes mellitus type 2               |
| 76 | F | 52 | TT | AG | *1A/*1B | Steatohepatitis, Diabetes mellitus type 2, dyslipidemia |
| 77 | F | 33 | TT | AA | *1A/*1A | Steatohepatitis, Diabetes mellitus type 2, dyslipidemia |
| 78 | F | 63 | TT | AG | *1A/*1B | Steatohepatitis, Diabetes mellitus type 2, dyslipidemia |
| 79 | M | 48 | TT | AG | *1A/*1B | Steatohepatitis, Diabetes mellitus type 2, dyslipidemia |

Kidney/OATP1B1

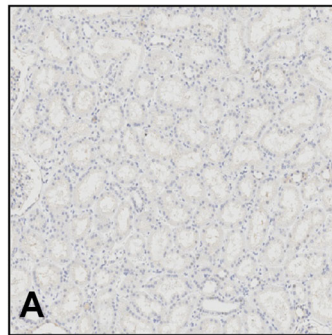

Kidney/OATP1B3

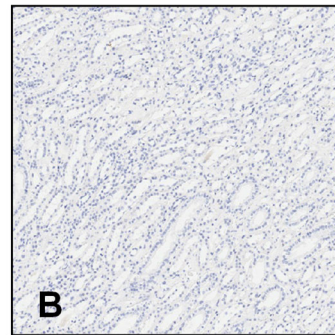

**Fig. S I IHC of OATP1B1 and OATP1B3 in human kidney tissues.** IHC of OATP1B1 (A) and OATP1B3 (B) (1:1000 dilution) in negative control kidney tissues.

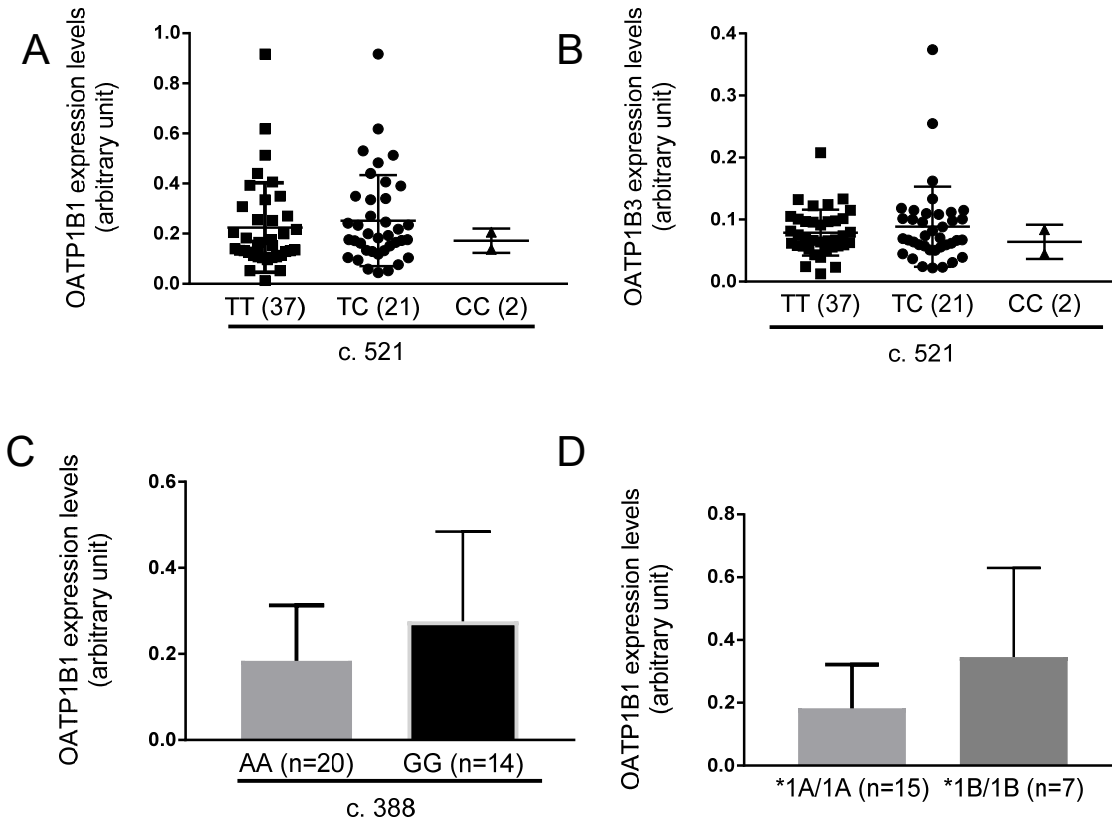

**Fig. S II Semi-quantification of OATP1B1 and OATP1B3 IHC in human liver tissue.** Semi-quantification of OATP1B1 (A) and OATP1B3 (B) antibody staining in human liver tissue donors genotyped for OATP1B1 c. 521 TT (square, n=37), TC (circle, n=21) and CC (triangle, n=2). Semi-quantification of OATP1B1 expression in human liver tissue donors harboring (C) OATP1B1 c. 388 AA (n=20) and GG (n=14) and (D) \*1A/1A (c.388A-c.521T, n=15) and \*1B/1B (c.388G-c.521T, n=7). Two-tailed student t-test were conducted in (C) and (D). Non-cirrhotic and non-HCV liver tissues were used in A-D.

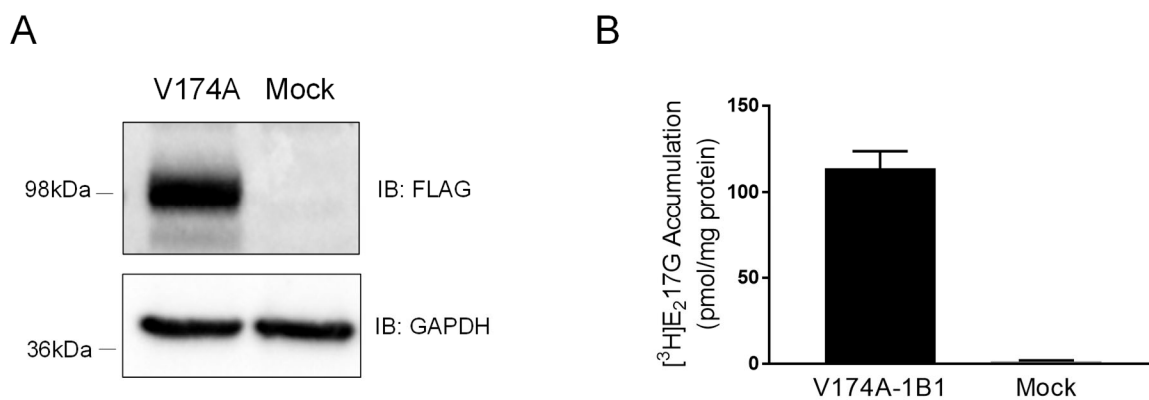

**Fig. S III Characterization of HEK293-FLAG-V174A-OATP1B1 stable cell line.** (A) Immunoblot of HEK293-FLAG-V174A-OATP1B1 and negative control cell line, HEK293-Mock. Whole cell lysates (50  $\mu\text{g}$ ) were separated on a 10% SDS-PAGE gel and probed with FLAG and GAPDH antibodies. FLAG antibody was used to detect OATP1B1 expression. GAPDH served as the loading control. A representative image is shown (n=3). (B)  $[^3\text{H}]E_217\beta\text{G}$  (1  $\mu\text{M}$ , 2 min) accumulation of HEK293-FLAG-V174A-OATP1B1 vs. the HEK293-Mock negative control cell line. Data represent mean  $\pm$  SD, n=1 (>3 samples).

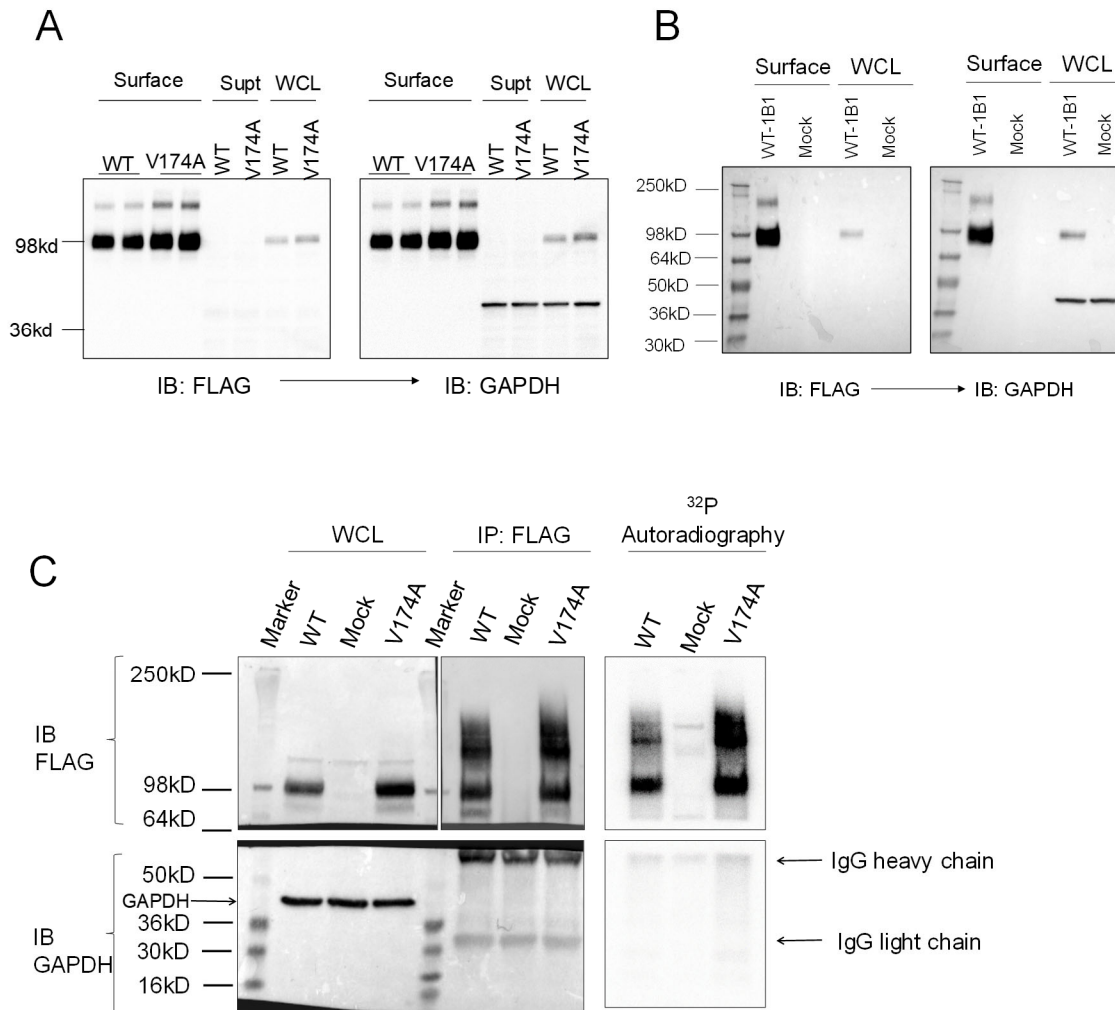

**Fig. S IV Full blots of surface biotinylation and phosphorylation determination.** (A) Full blots of Fig. III. WT- and V174A-OATP1B1 was determined by pulling down surface proteins with NeutrAvidin beads. From the same blot, the membrane is first probed with an anti-FLAG antibody (A), followed by an anti-GAPDH antibody without stripping. (B) Surface biotinylation followed by FLAG immunoblot in HEK293-FLAG-WT-OATP1B1 and negative control HEK293-Mock cells, showing the upper band is specific to FLAG-OATP1B1. (C) Full blot of Fig. VI A. HEK293-FLAG-WT- and -V174A-OATP1B1 was metabolically labeled with <sup>32</sup>P-orthophosphate for 5 h. After labelling, cells were lysed and whole cell lysates (WCL) (500 µg) were immunoprecipitated (IP) with FLAG antibody and subjected to autoradiography and subsequent immunoblot (IB) with FLAG and GAPDH antibodies. HEK293-Mock cells were used as negative control. Blot was cut at ~64 kD. The upper part was probed with mouse FLAG antibody, and the lower part was probed with mouse GAPDH. Goat anti-mouse secondary antibody was used in immunoblot. After incubation with goat anti-mouse secondary antibody, images were captured.

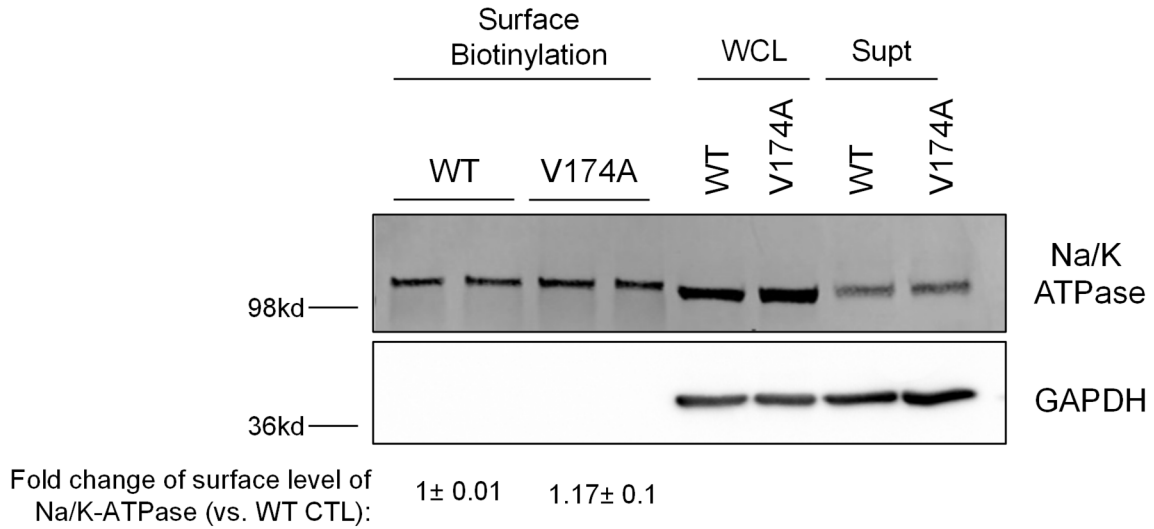

**Fig. S V Surface expression of the Na/K-ATPase in HEK293-WT- and -V174A-OATP1B1 cells.** Protein levels of Na/K-ATPase in the biotinylated membrane fraction, whole cell lysate (WCL) and intracellular supernatant (Supt). A Na/K-ATPase antibody was used to detect Na/K-ATPase expression and GAPDH was used a cytoplasmic marker. The densitometry of Na/K-ATPase was determined in all fractions. The fold change in the percentage of Na/K-ATPase expressed on the surface was expressed as the amount in the surface fraction divided by the sum of the surface fraction and scaled up supernatant fraction in HEK293-V174A-OATP1B1 vs. HEK293-WT-OATP1B1 (n=1 in duplicate, data represent mean  $\pm$  range).

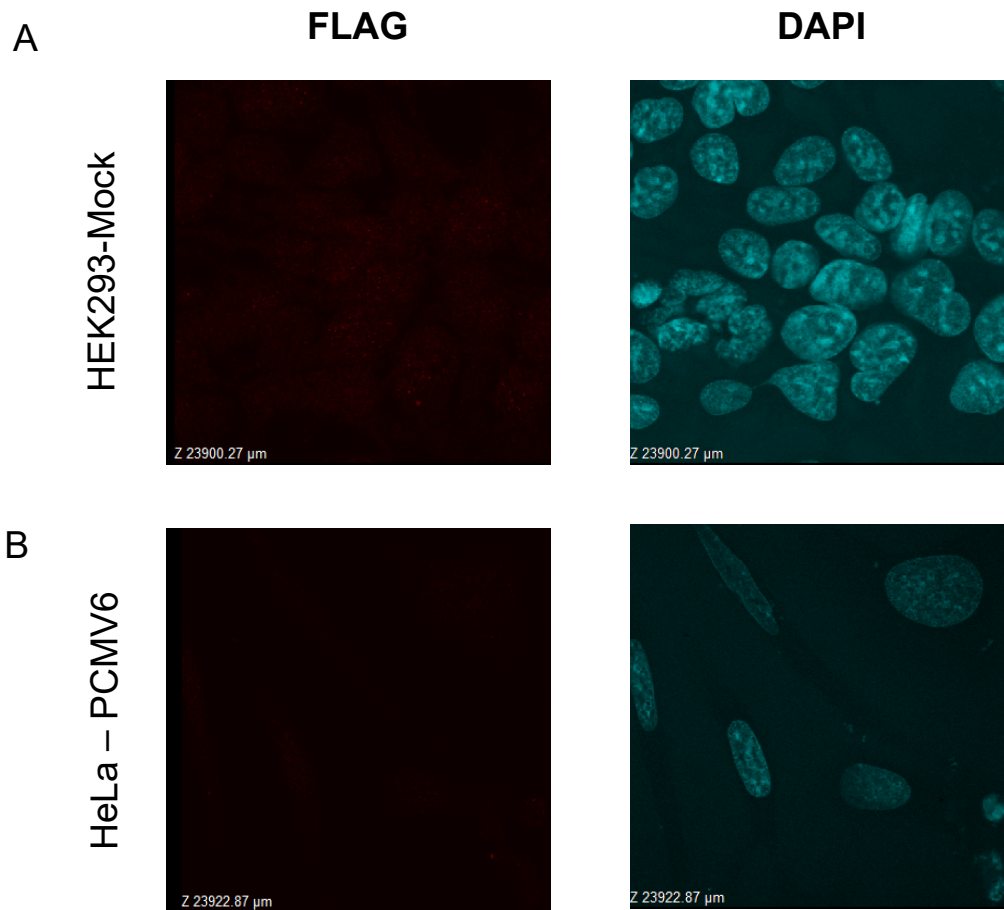

**Fig. S VI Immunocytochemistry staining in negative controls.** (A) HEK293-Mock stable cell line stained with FLAG antibody. Cells were seeded on coverslips at  $1.5 \times 10^5$  cells/well and were grown to confluence for 48 h. Cells were stained with FLAG antibody (red) and counterstained with DAPI (blue) to visualize OATP1B1 and nuclei, respectively. (B) HeLa cells transiently transfected and stained with FLAG antibody. HeLa cells were plated on coverslips at a density of  $2.5 \times 10^4$  cells/well and were transfected with PCMV6 empty vector 24 h later. Forty-eight hours post-transfection, cells were stained with FLAG antibody (red) to visualize OATP1B1 and were counterstained with DAPI (blue) to show nuclei. Images were captured using the Olympus FV10i confocal microscope at a 120X objective and 1024x1024 resolution.

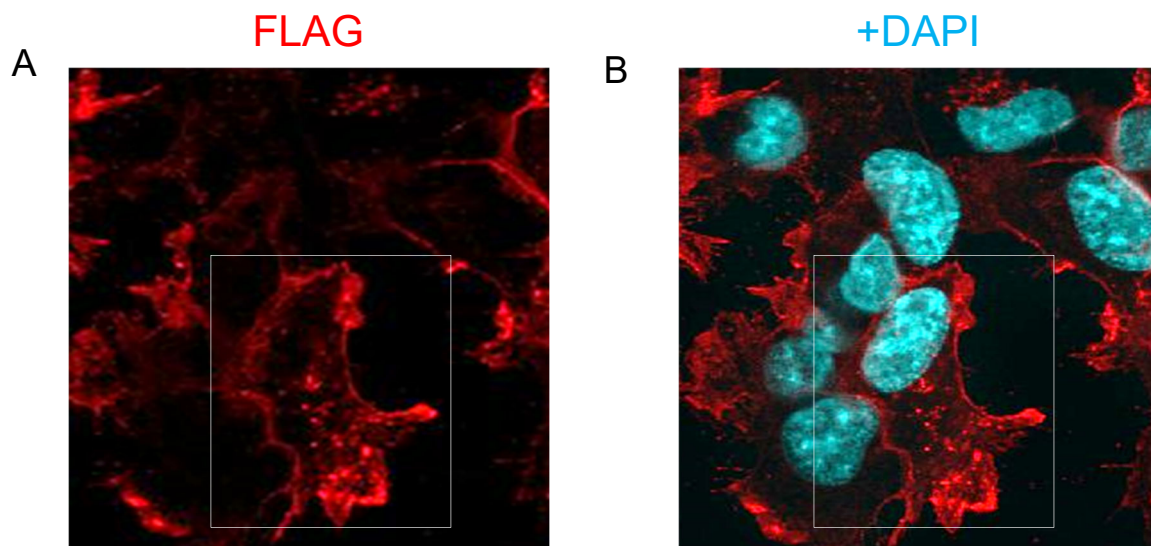

**Fig. S VII Amount of intracellular staining of FLAG-OATP1B1 in HEK293-FLAG-WT-OATP1B1 cells.** HEK293-FLAG-WT-OATP1B1 cells were seeded at  $1.5 \times 10^5$  cells/well and grown for 24 h. Cells were fixed and stained with FLAG antibody (1:100, red) (A) and overlaid with DAPI (B) as detailed in the Materials and Methods section.



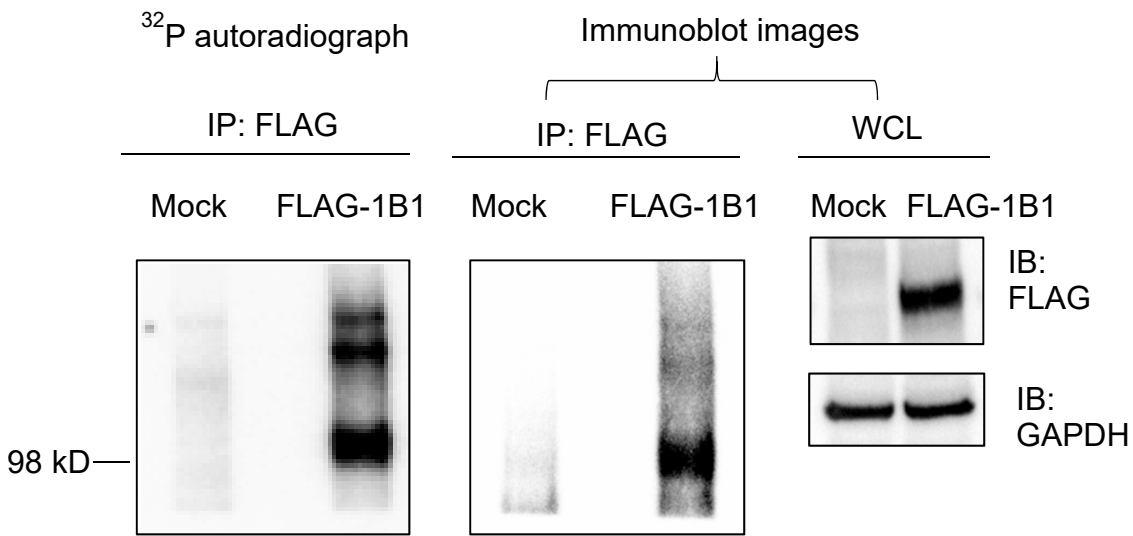

**Fig. S VIII Phosphorylation of HEK293-WT-FLAG-OATP1B1.** HEK293-FLAG-WT-OATP1B1 stable cell line ( $2.5 \times 10^6$  cells/100mm<sup>2</sup> dish) was metabolically labelled with <sup>32</sup>P-orthophosphate (0.1mCi/ml) for 5 h at 37°C. (A) HEK293-Mock cells (empty vector) were labelled with <sup>32</sup>P-orthophosphate under the same conditions and were used as a negative control. Lysis, immunoprecipitation (IP), SDS-PAGE, autoradiography, and immunoblot (IB) analyses were performed. <sup>32</sup>P-orthophosphate-labelled FLAG-OATP1B1 in whole cell lysate (WCL) (500 µg) was immunoprecipitated with FLAG antibody. Phosphorylation of OATP1B1 was determined using autoradiography. Immunoblot with FLAG antibody was used to detect FLAG-tagged OATP1B1 expression. GAPDH antibody served as the loading control for WCL.

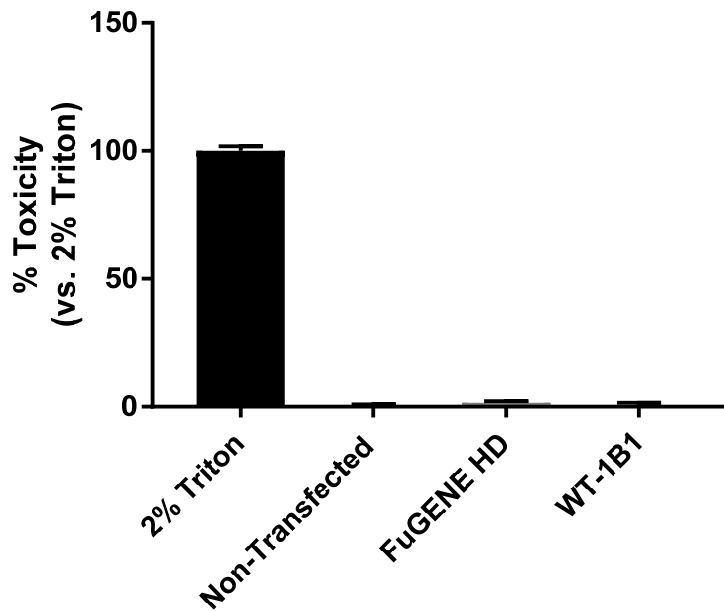

**Fig. S IX Lactic Acid Dehydrogenase (LDH) assay testing toxicity of transient transfection in HeLa cells.** HeLa cells were seeded at  $2.5 \times 10^4$  cells/well and transfected with FLAG-WT-OATP1B1, FuGENE HD alone or non-transfected. Forty-eight hours post-transfection, non-transfected cells (in triplicate) were treated with 2% Triton X-100 in DMEM for 30 min at 37°C. Media was collected from all wells and spun down for 2 min at 13,000rpm. Cytotoxicity of non-transfected and transfected cells was determined using the LDH cytotoxicity kit (Sigma, St. Louis, MO), according to manufacturer's instructions. The 2% Triton X-100 treatment served as the positive control ( $n=1$  in triplicate).

|         | IHC: OATP1B1                                                                                                                                                                                                                                                                                       | IHC: OATP1B3                                                                                                                                                                                                                                                                                        |
|---------|----------------------------------------------------------------------------------------------------------------------------------------------------------------------------------------------------------------------------------------------------------------------------------------------------|-----------------------------------------------------------------------------------------------------------------------------------------------------------------------------------------------------------------------------------------------------------------------------------------------------|
| 1<br>NM | 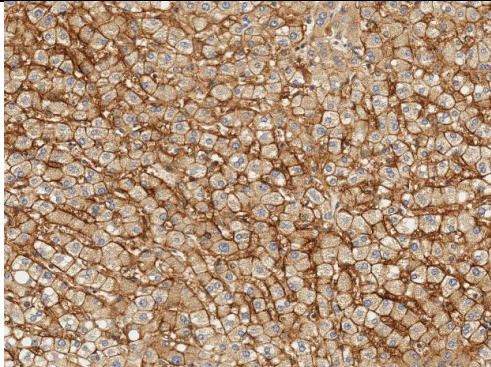 A high-magnification immunohistochemical (IHC) image showing a dense population of cells with brown cytoplasmic staining for OATP1B1. Nuclei are counterstained with blue hematoxylin.                           |  A high-magnification IHC image showing a dense population of cells with brown cytoplasmic staining for OATP1B3. Nuclei are counterstained with blue hematoxylin.                                                 |
| 2       |  A high-magnification IHC image showing a dense population of cells with brown cytoplasmic staining for OATP1B1. Nuclei are counterstained with blue hematoxylin.                                                 |  A high-magnification IHC image showing a dense population of cells with brown cytoplasmic staining for OATP1B3. Nuclei are counterstained with blue hematoxylin.                                                 |
| 3       |  A high-magnification IHC image showing a dense population of cells with brown cytoplasmic staining for OATP1B1. Nuclei are counterstained with blue hematoxylin. There is a white artifact in the lower center. |  A high-magnification IHC image showing a dense population of cells with brown cytoplasmic staining for OATP1B3. Nuclei are counterstained with blue hematoxylin. There is a white artifact in the lower center. |
| 4       |  A high-magnification IHC image showing a dense population of cells with brown cytoplasmic staining for OATP1B1. Nuclei are counterstained with blue hematoxylin.                                               |  A high-magnification IHC image showing a dense population of cells with brown cytoplasmic staining for OATP1B3. Nuclei are counterstained with blue hematoxylin.                                               |



5

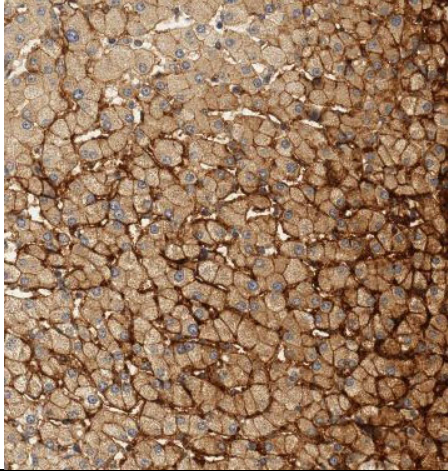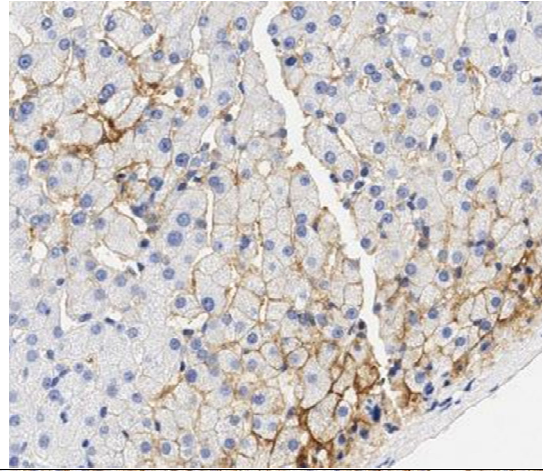

6  
LC

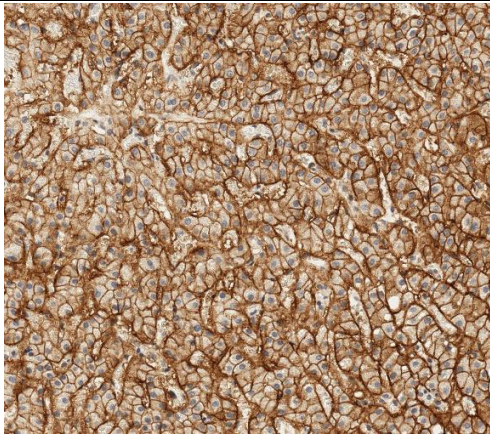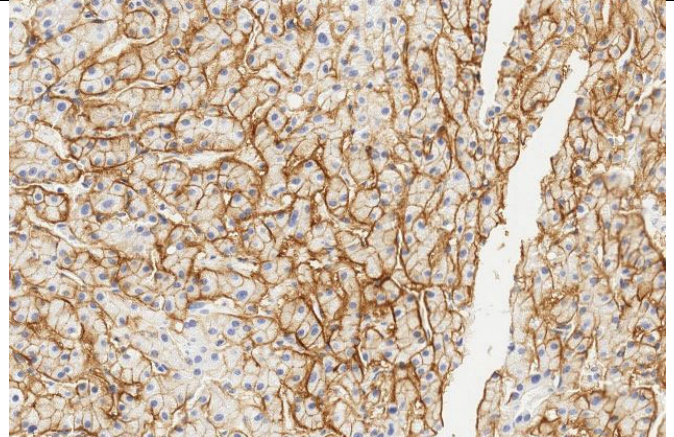

7

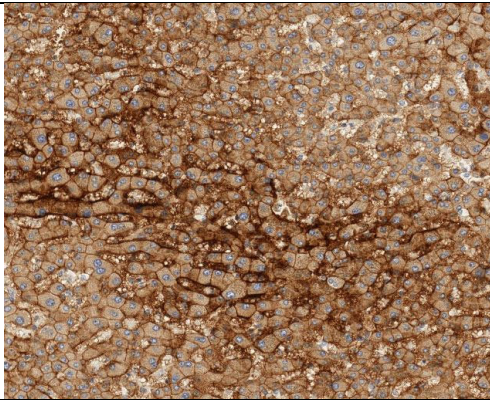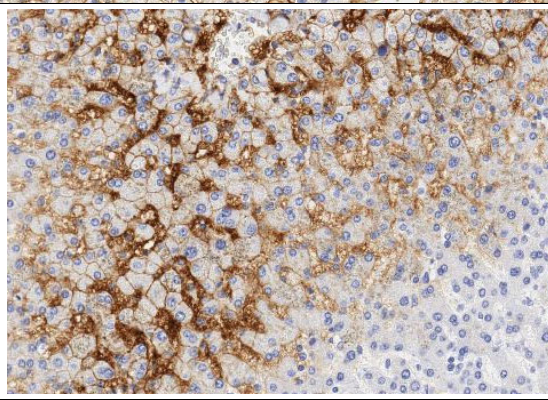



8

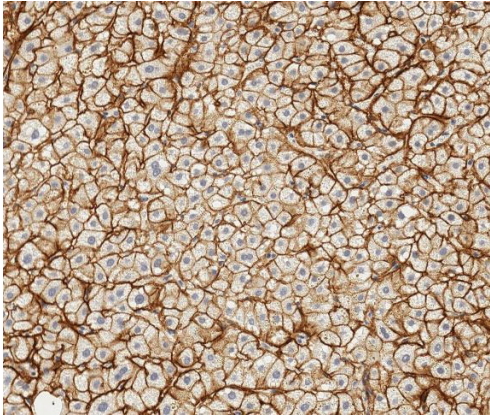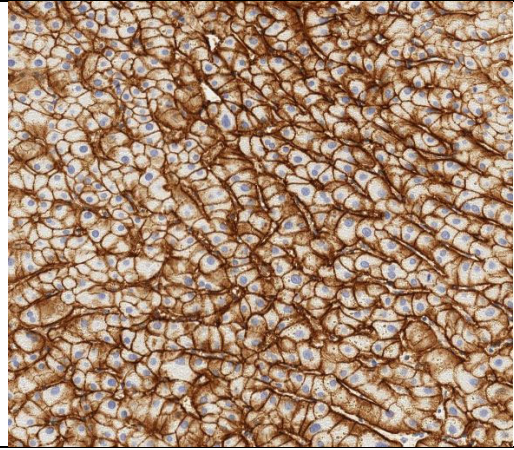

9  
NM

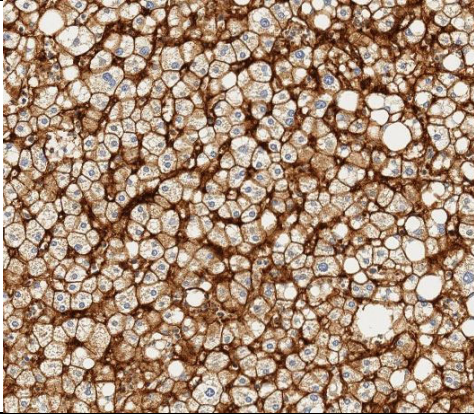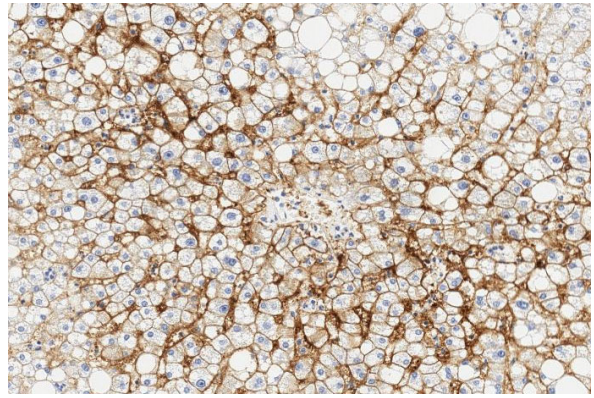

10  
NM

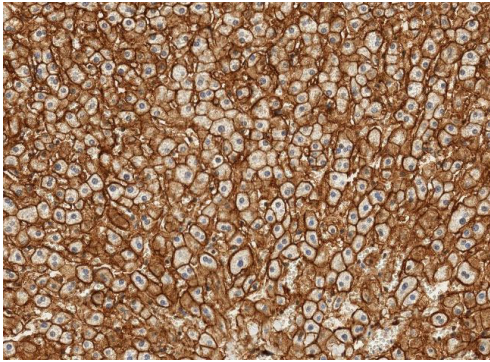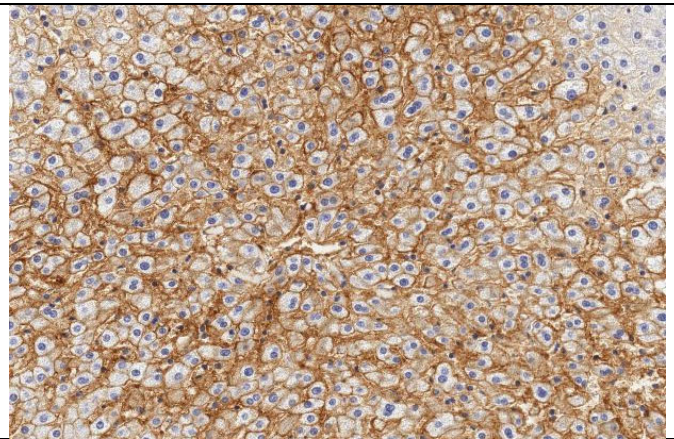



11

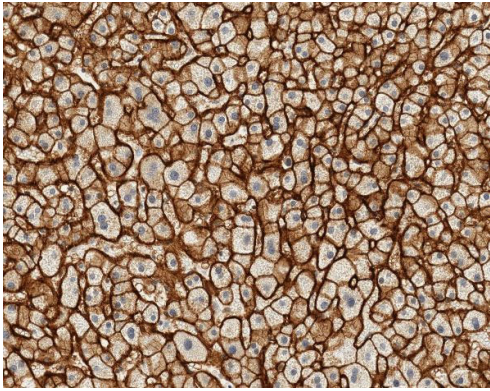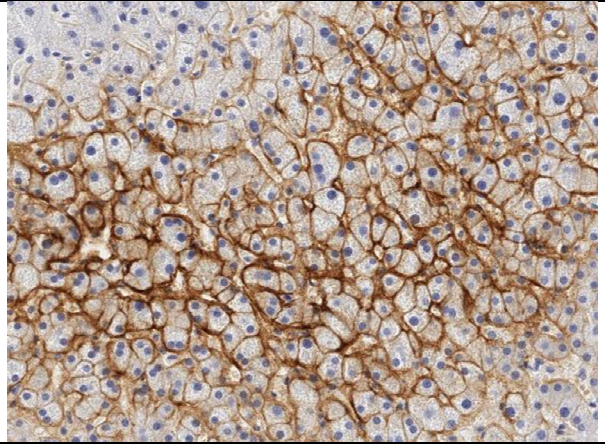

12

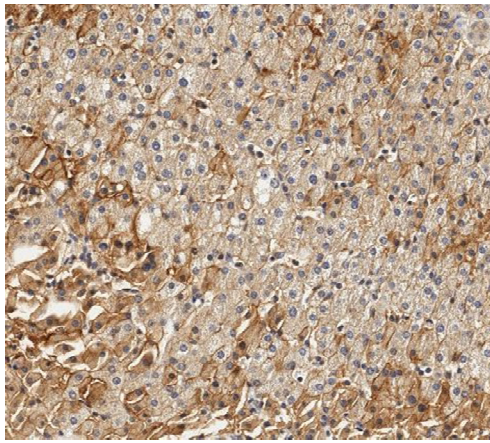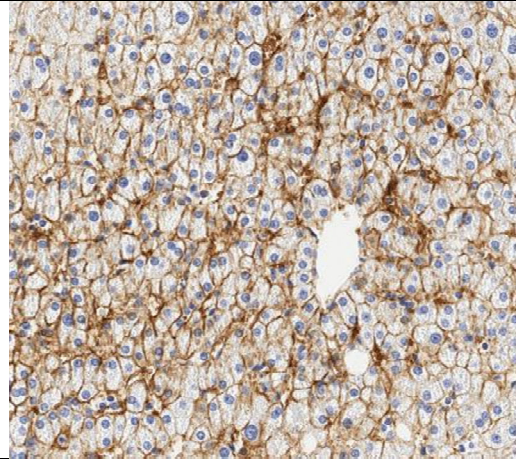

13  
LC

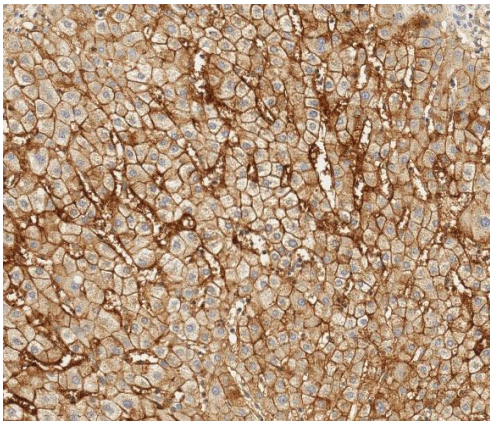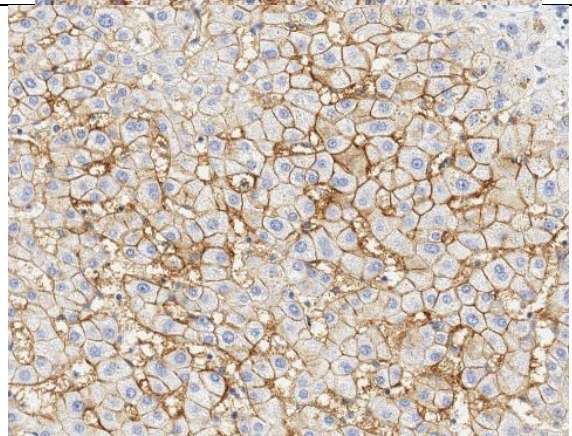



|          |                                                                                     |                                                                                      |
|----------|-------------------------------------------------------------------------------------|--------------------------------------------------------------------------------------|
| 14<br>LC | 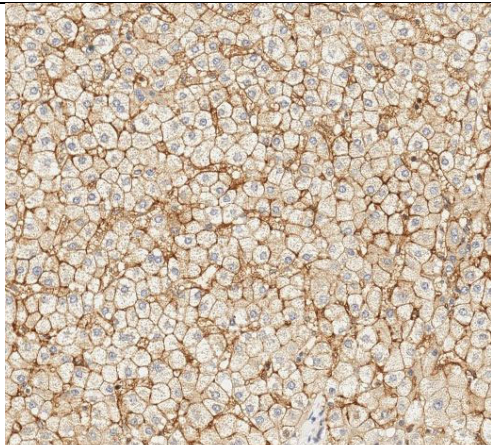   |    |
| 15       |   |   |
| 16       |  |  |



17

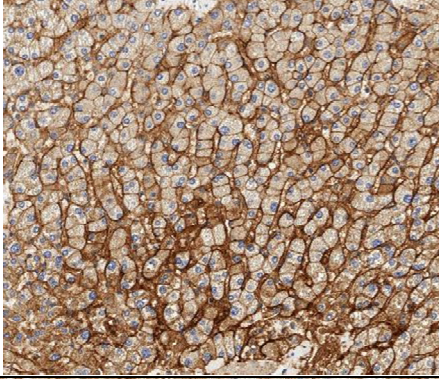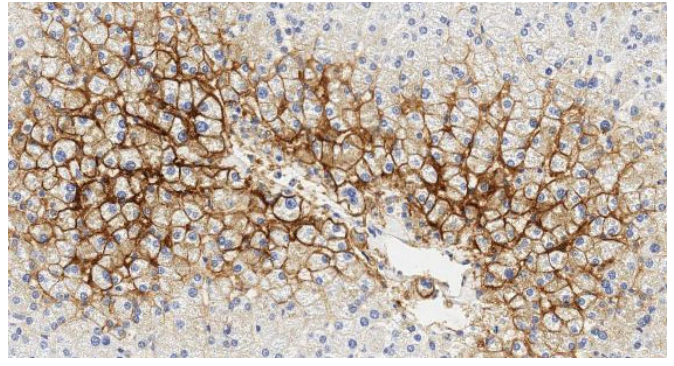

18

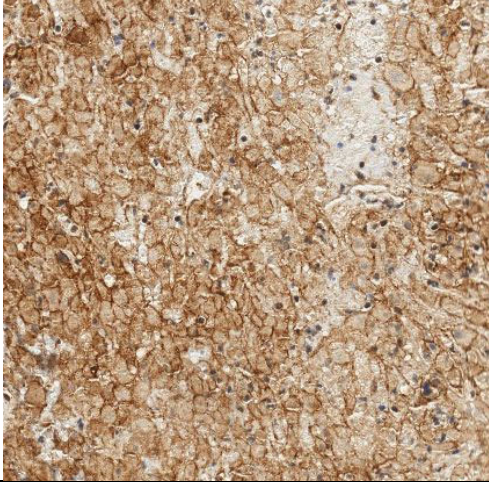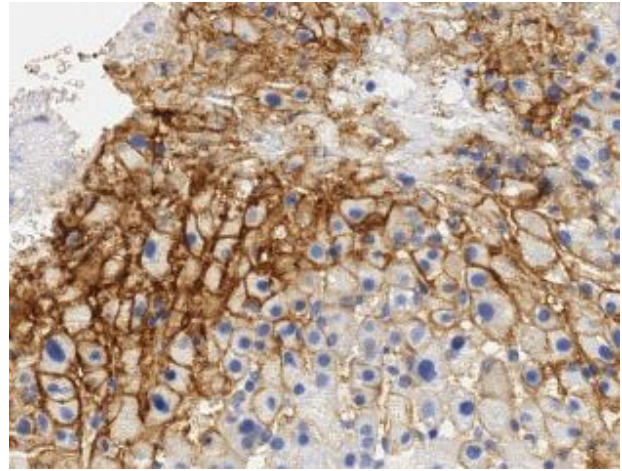

19

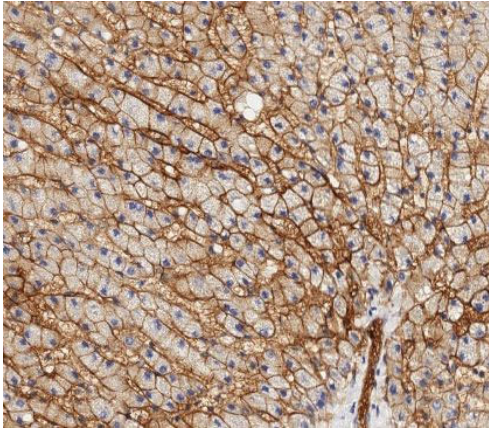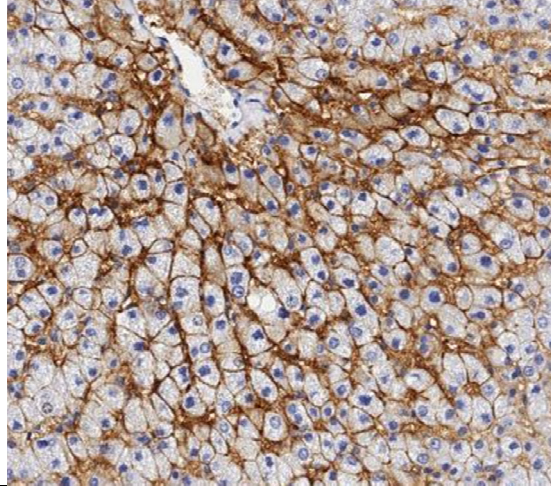



20  
LC

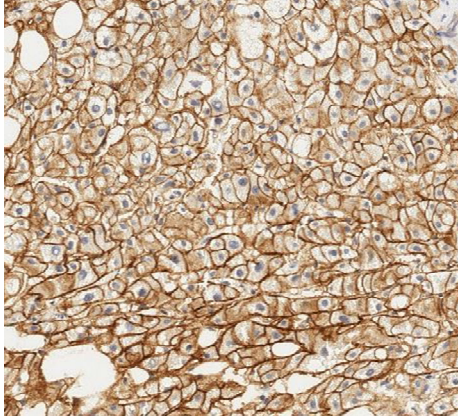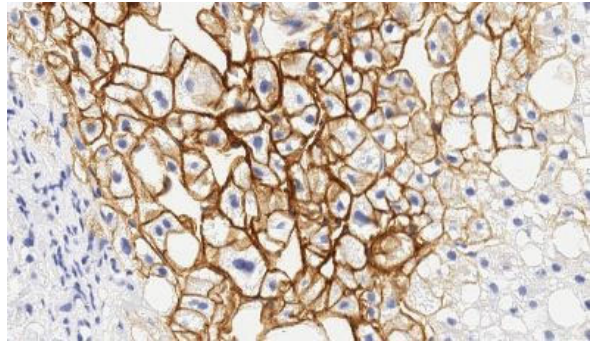

21

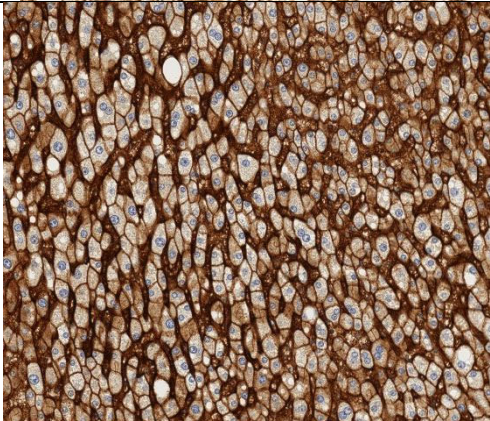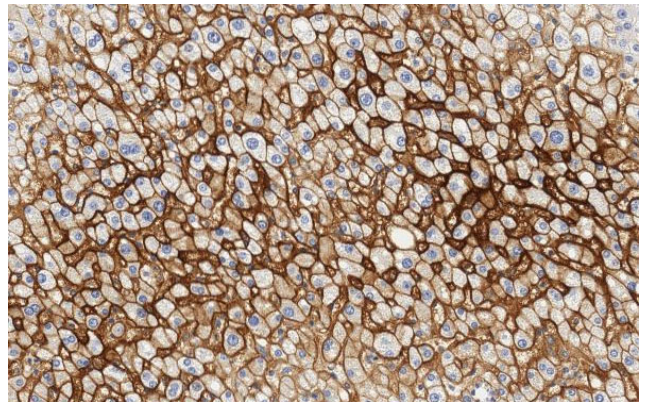

22  
NM

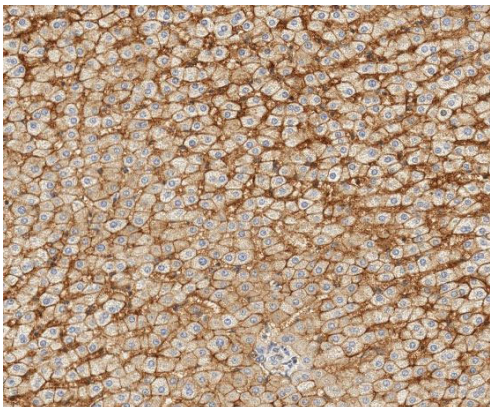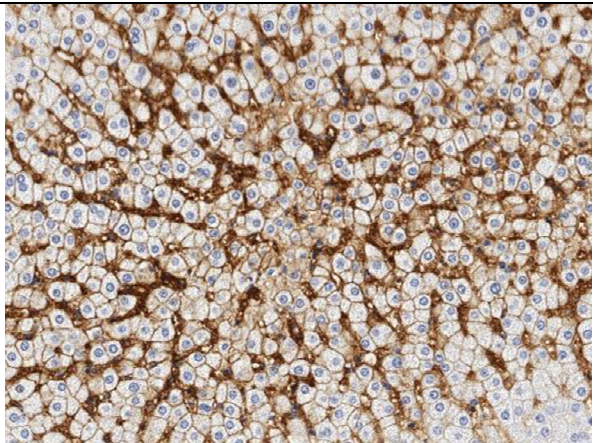



23

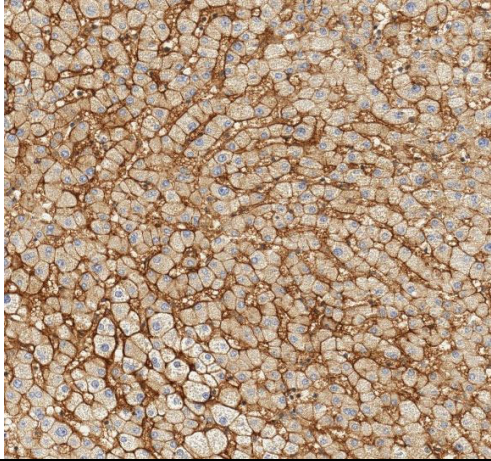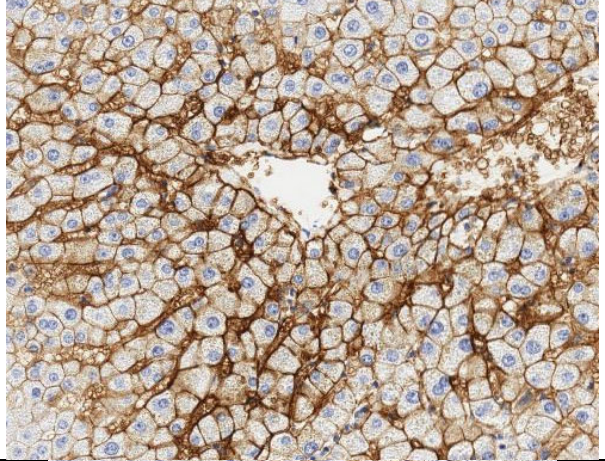

24

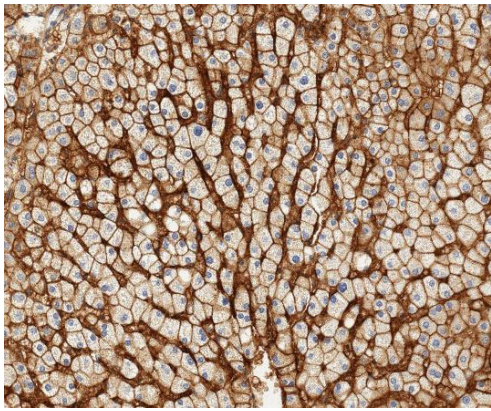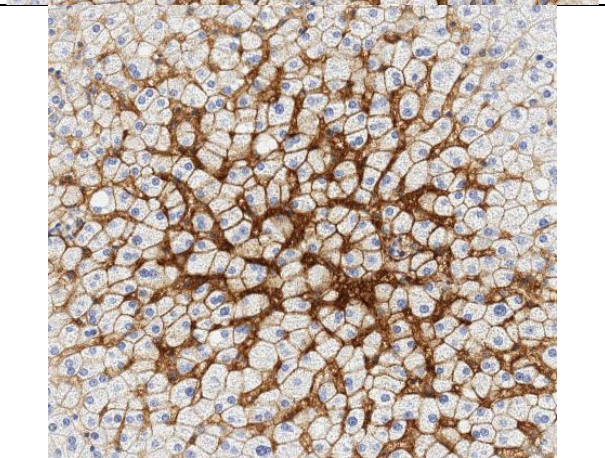

25

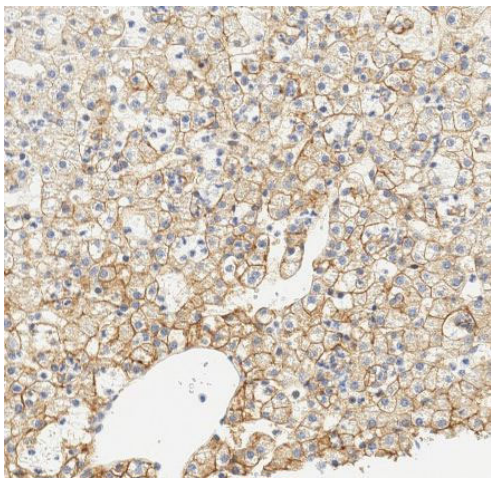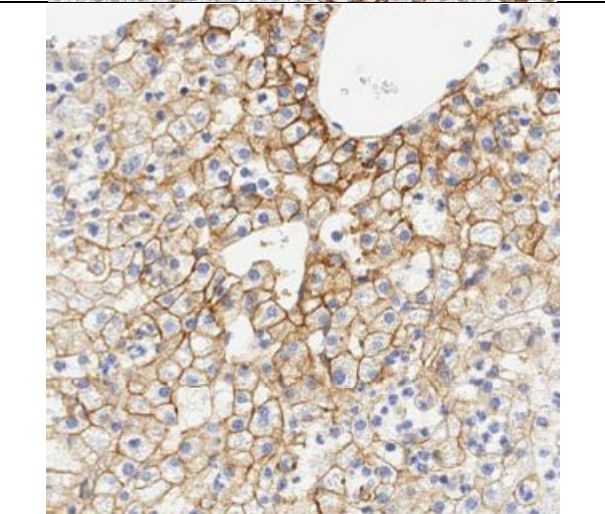



26

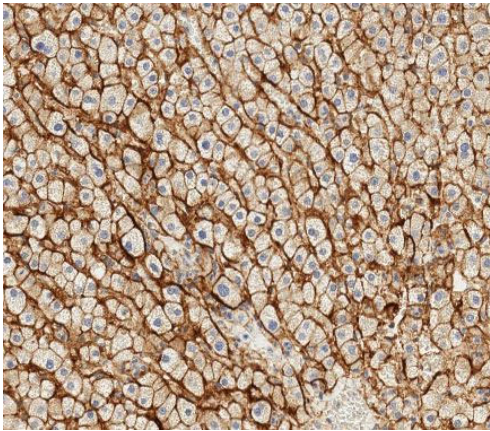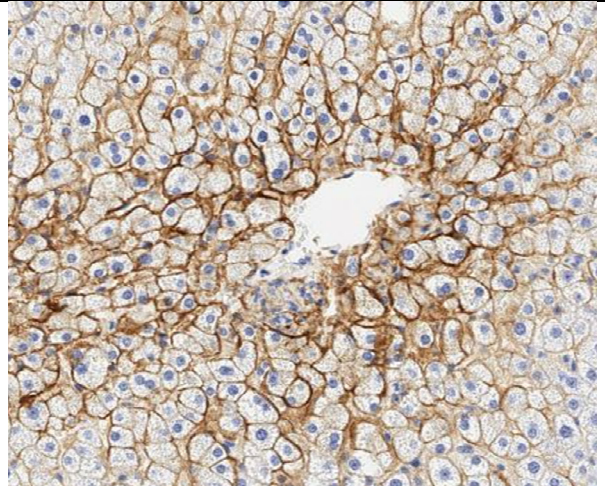

27

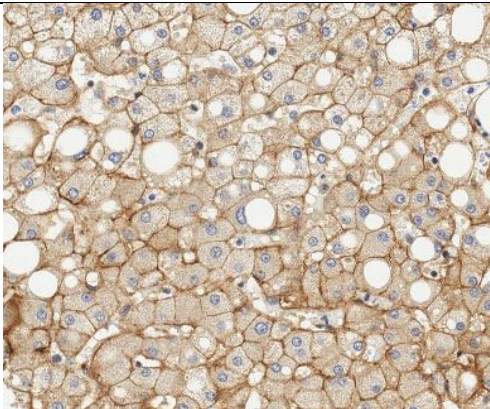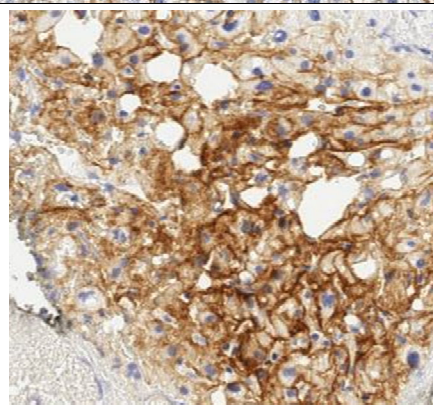

28

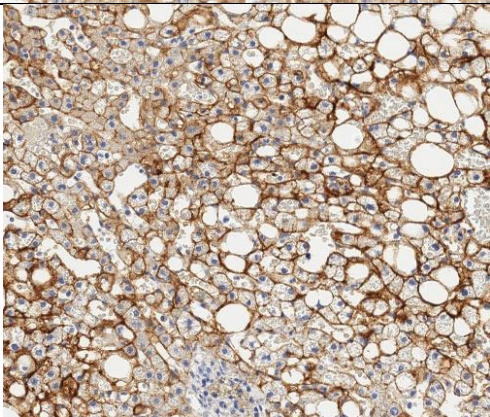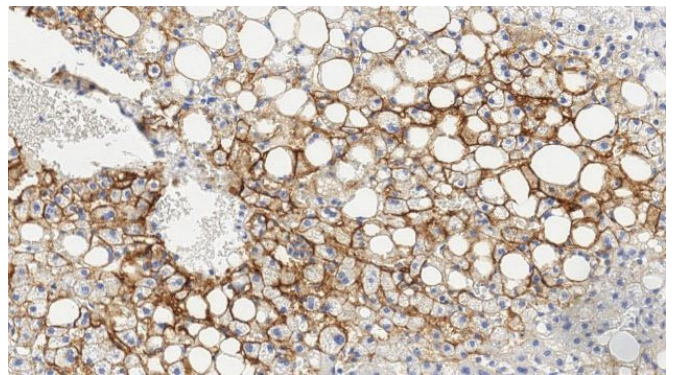



|          |                                                                                     |                                                                                      |
|----------|-------------------------------------------------------------------------------------|--------------------------------------------------------------------------------------|
| 29       | 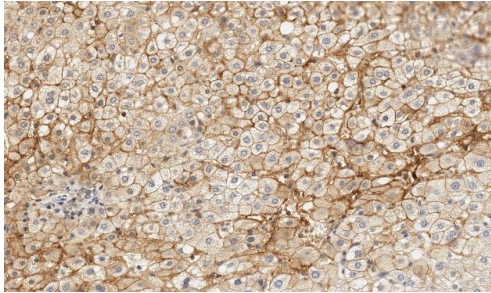   |    |
| 30<br>NM |   |   |
| 31<br>NM |  |  |



32

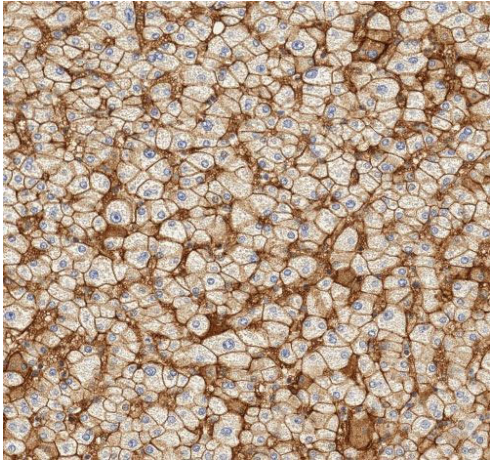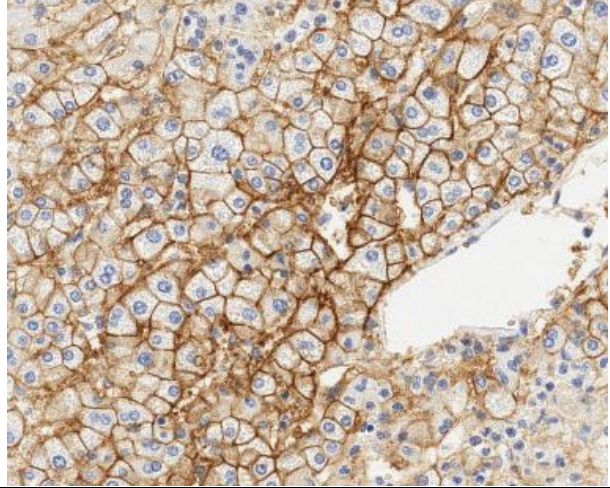

33  
LC

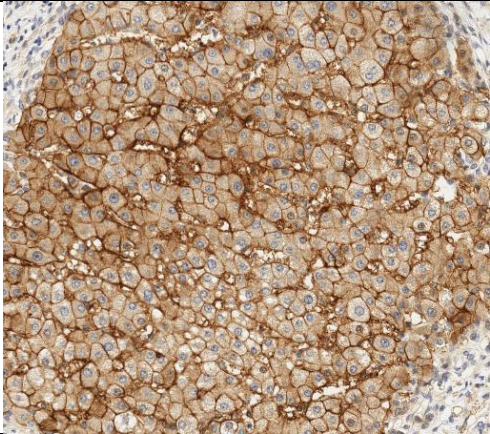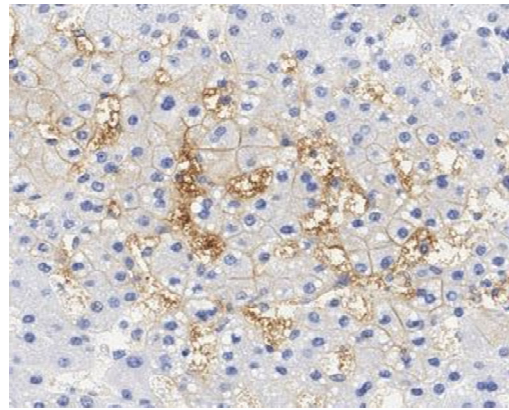

34  
NM

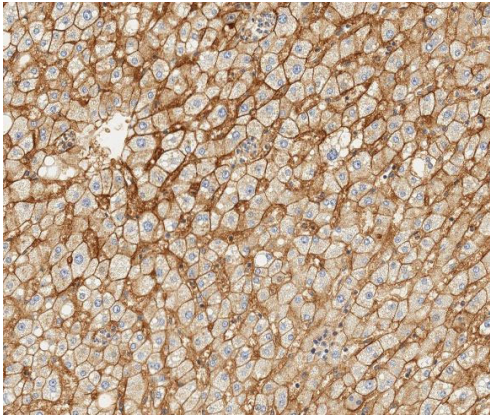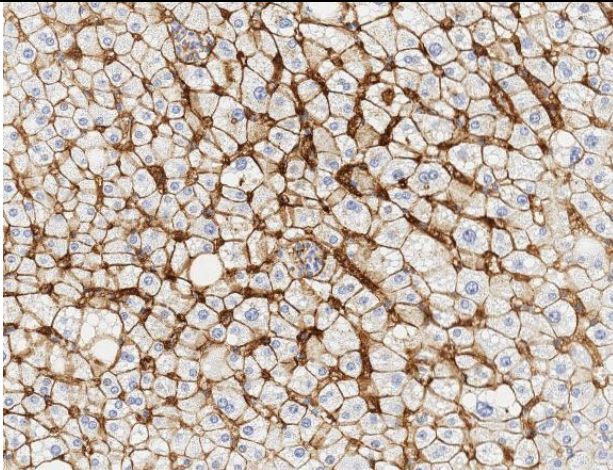



35

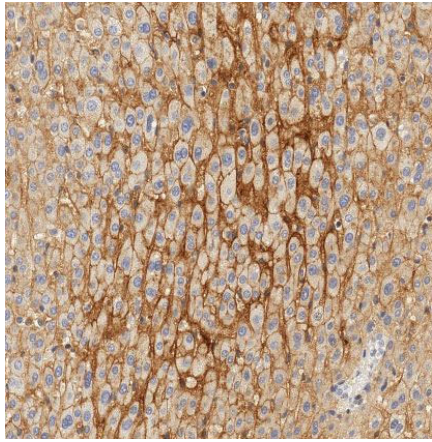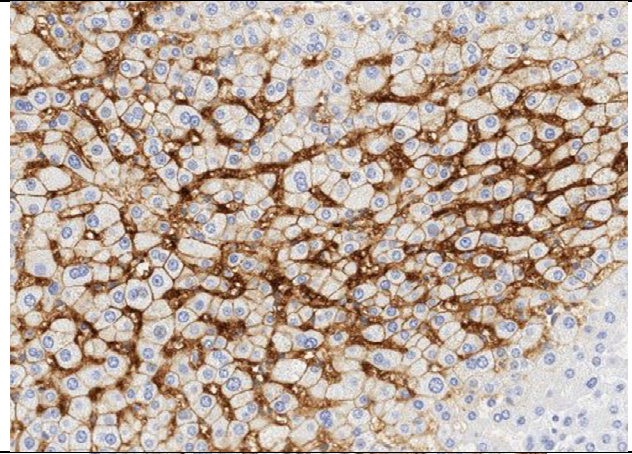

36

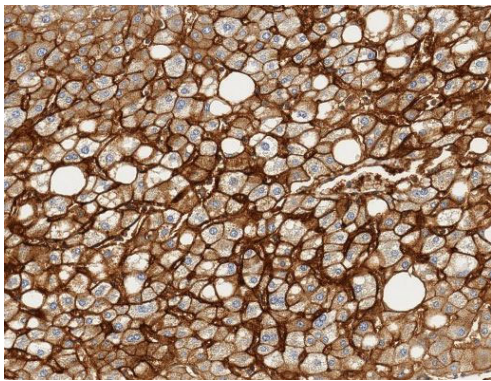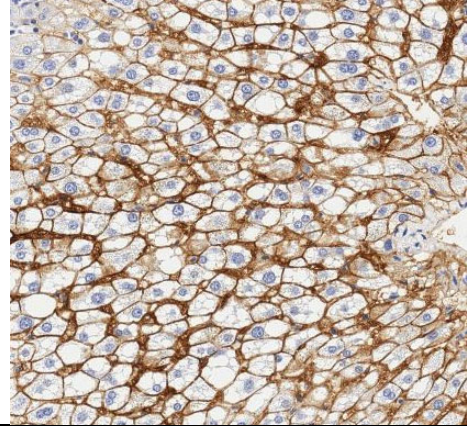

37  
NM

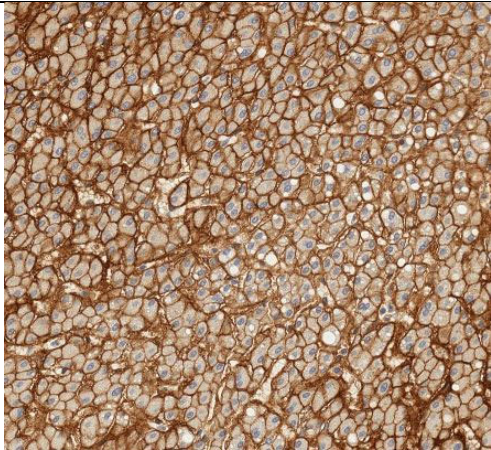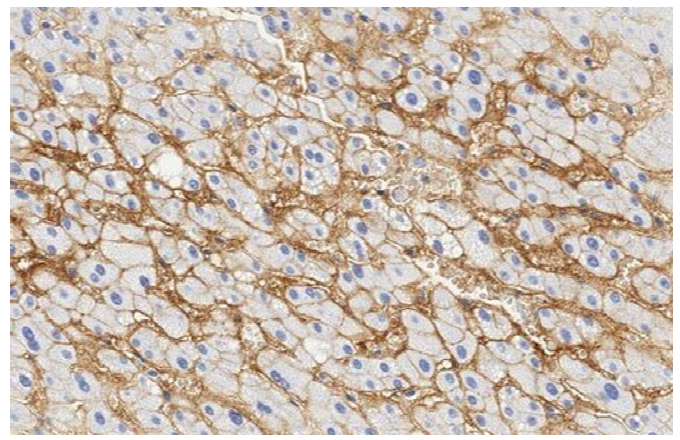



38  
LC

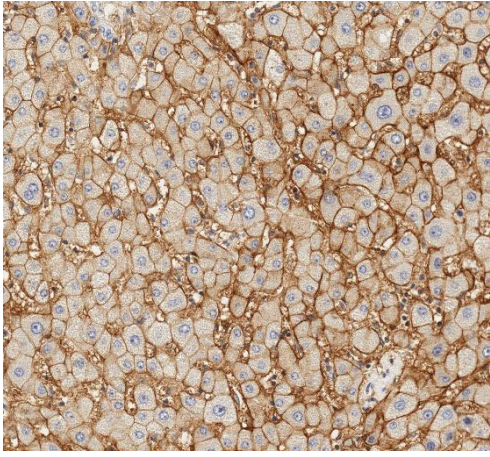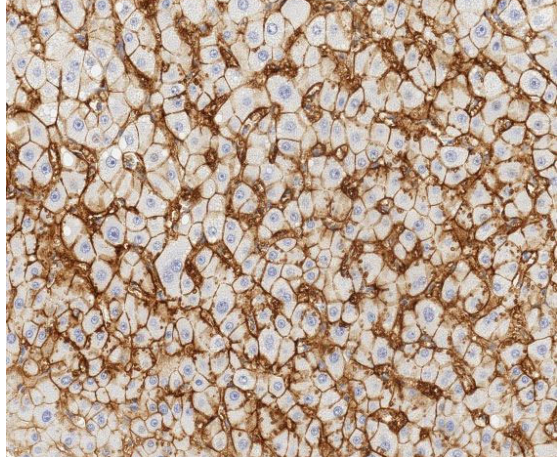

39

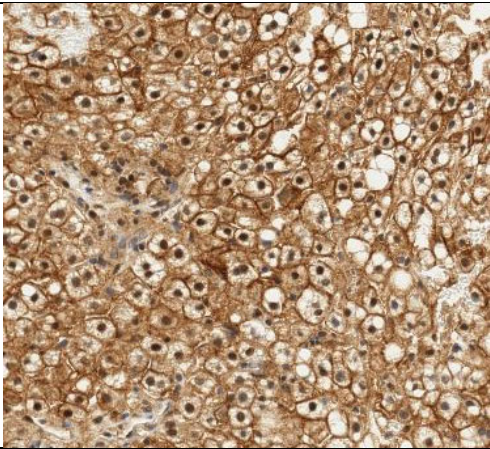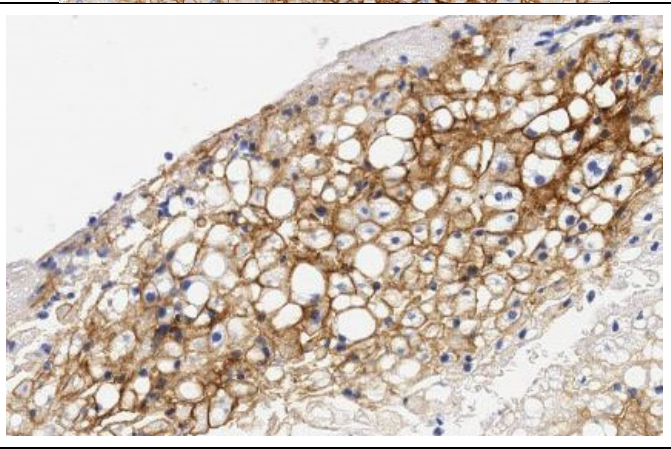

40

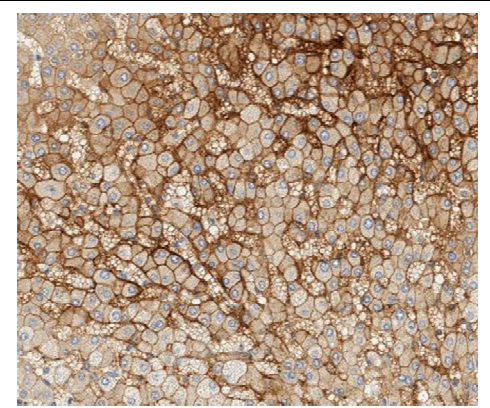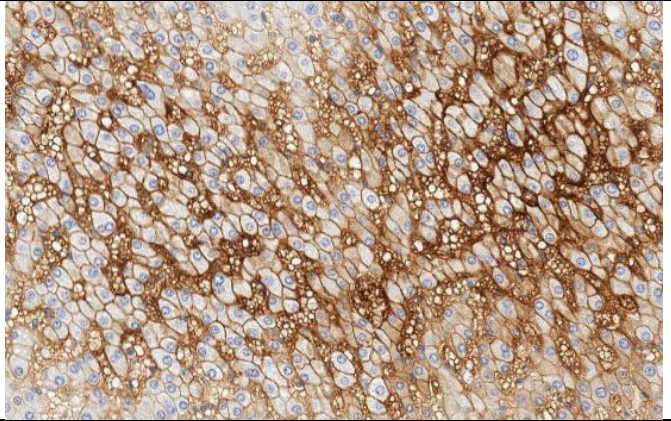



|                   |                                                                                     |                                                                                      |
|-------------------|-------------------------------------------------------------------------------------|--------------------------------------------------------------------------------------|
| <p>41<br/>CC</p>  | 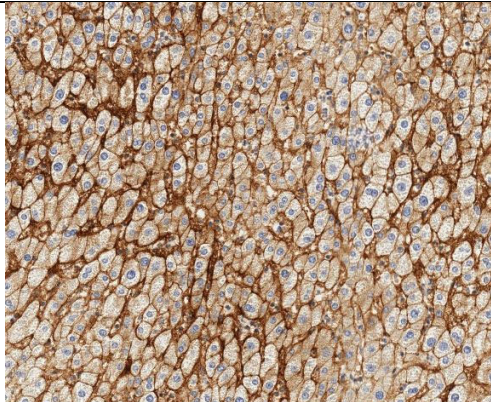   |    |
| <p>42</p>         |   |   |
| <p>43<br/>HCV</p> |  |  |



|                   |                                                                                     |                                                                                      |
|-------------------|-------------------------------------------------------------------------------------|--------------------------------------------------------------------------------------|
| <p>44<br/>HCV</p> | 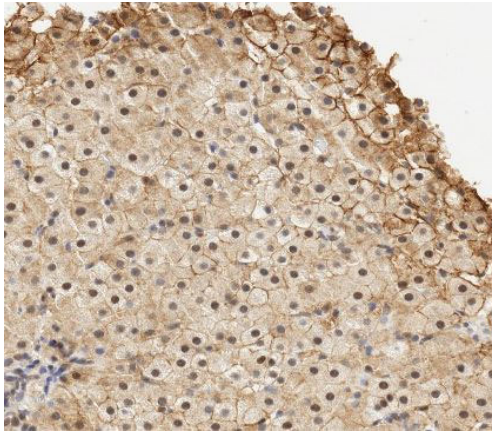   |    |
| <p>45<br/>HCV</p> |   |   |
| <p>46<br/>HCV</p> |  |  |



47  
HCV

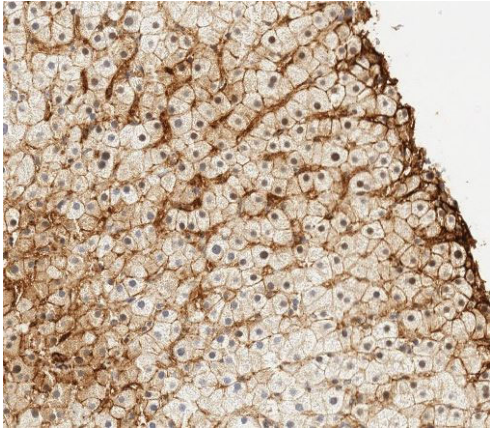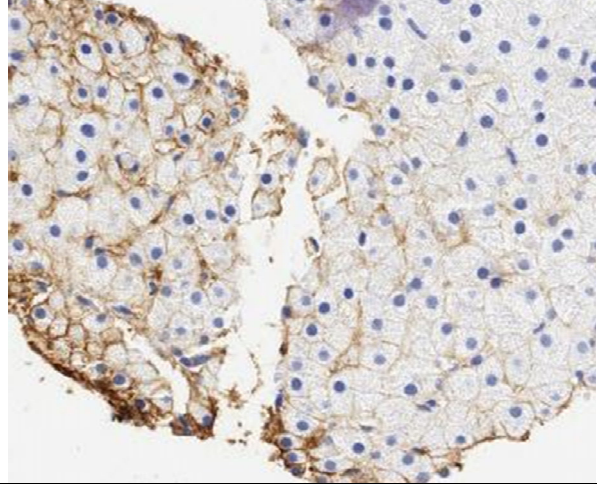

48  
HCV

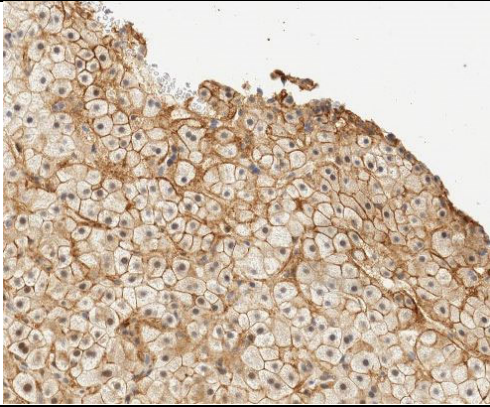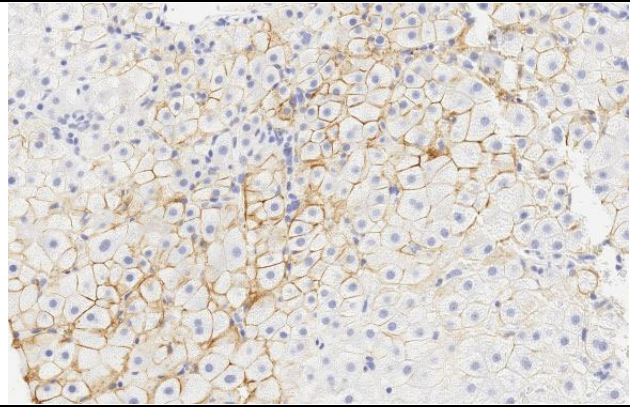

49  
HCV

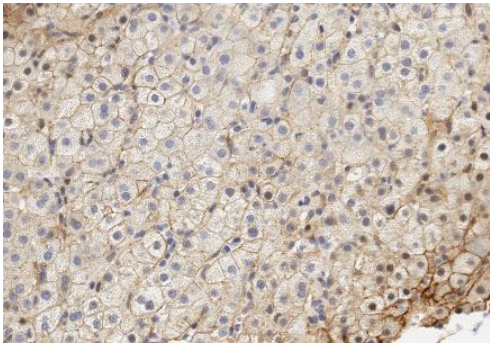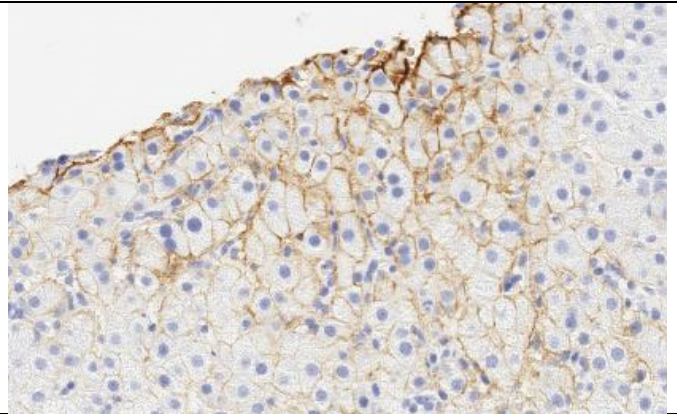

50  
HCV

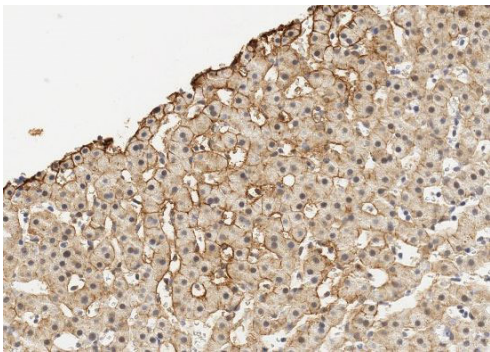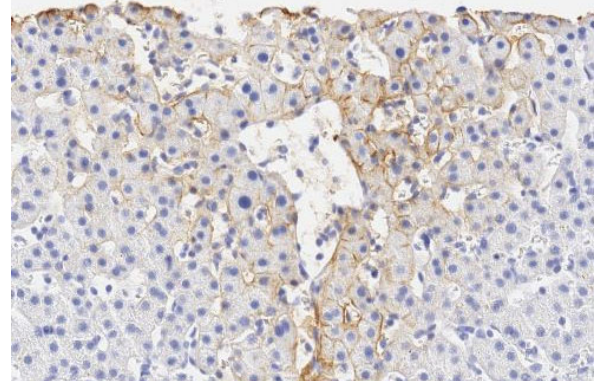



51  
HCV

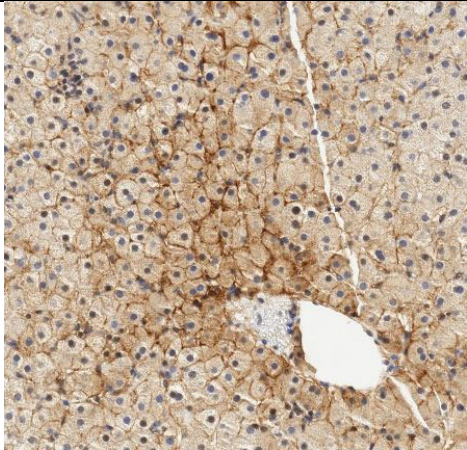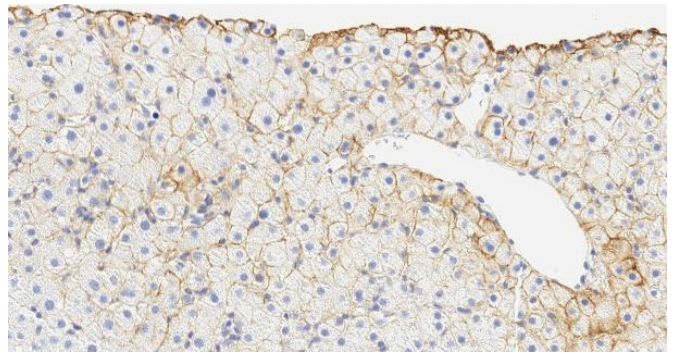

52  
HCV

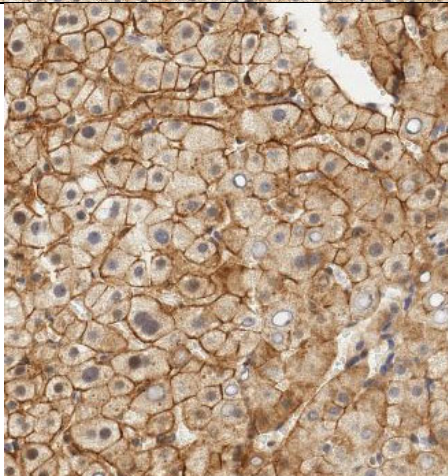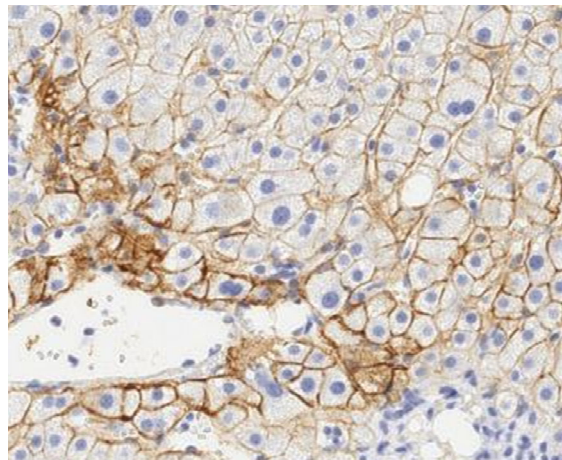

53  
HCV

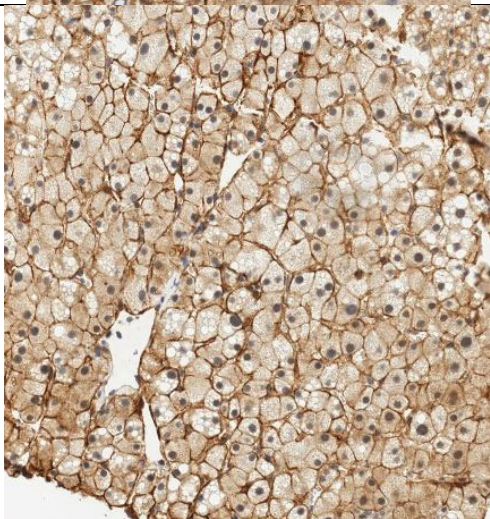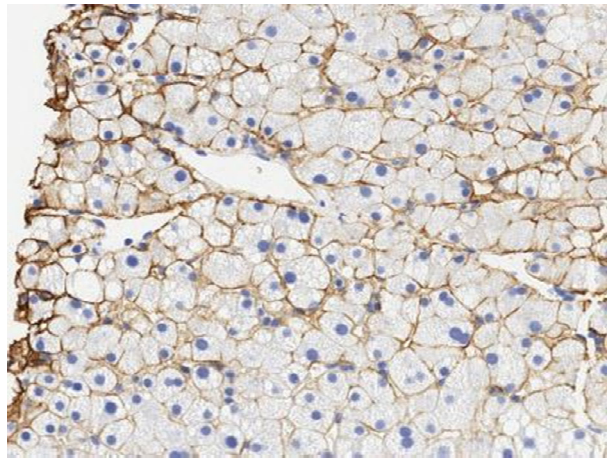



|                   |                                                                                     |                                                                                      |
|-------------------|-------------------------------------------------------------------------------------|--------------------------------------------------------------------------------------|
| <p>54<br/>HCV</p> | 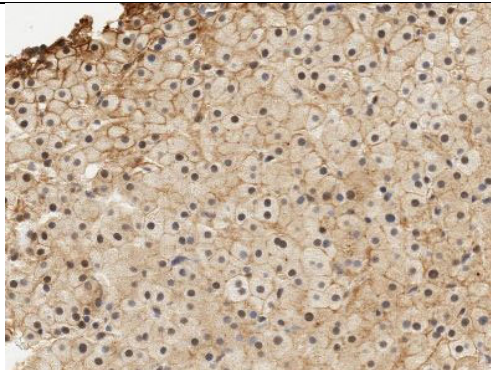   |    |
| <p>55<br/>HCV</p> |    |    |
| <p>56</p>         |  |  |
| <p>57</p>         |  |  |



58  
CC

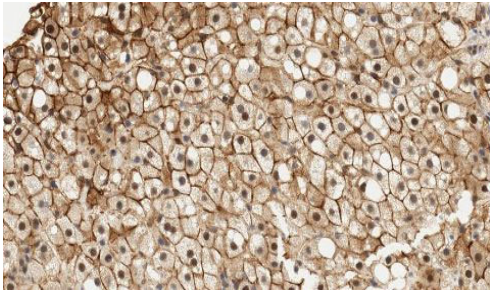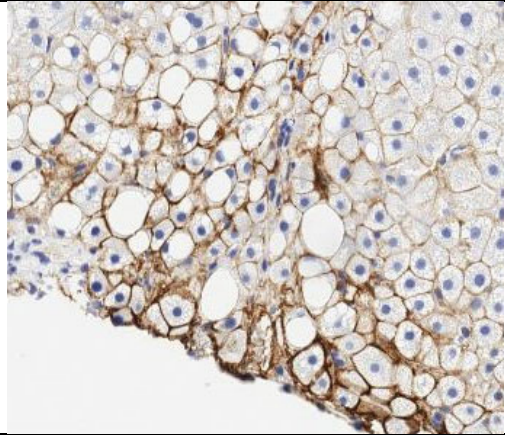

59

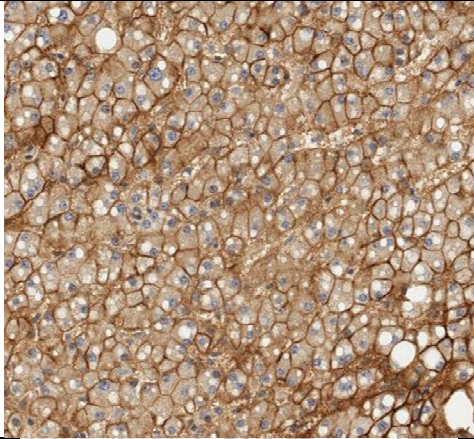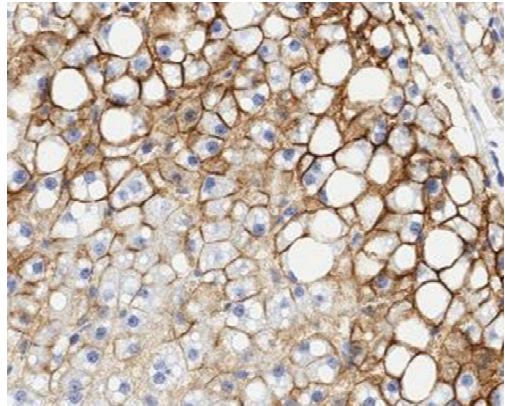

60

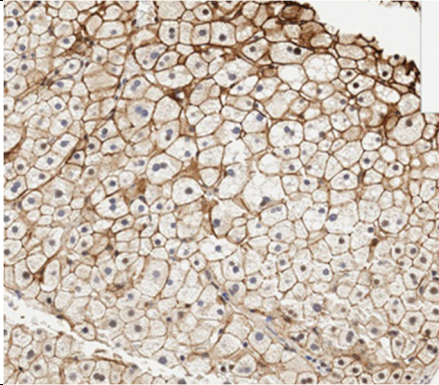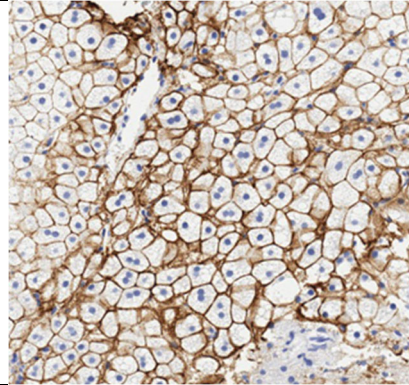

61

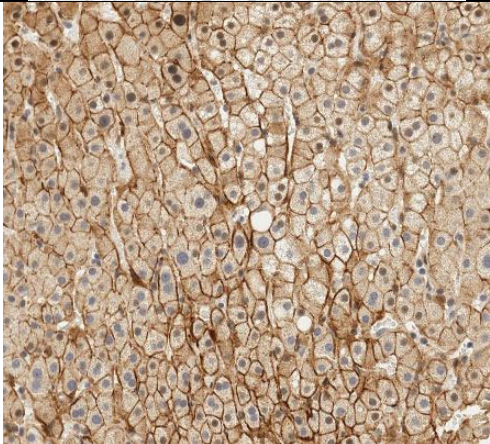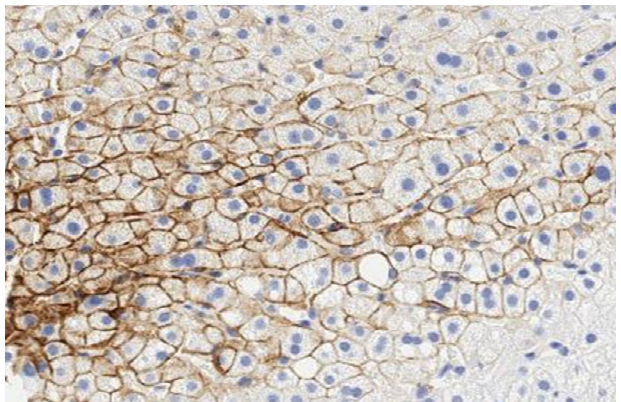



|    |                                                                                     |                                                                                      |
|----|-------------------------------------------------------------------------------------|--------------------------------------------------------------------------------------|
| 62 | 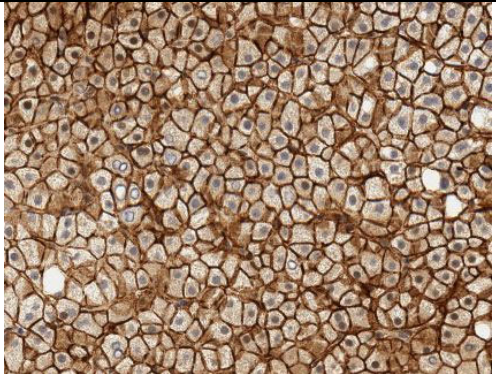   |    |
| 63 |    |    |
| 64 |  |  |
| 65 |  |  |



66

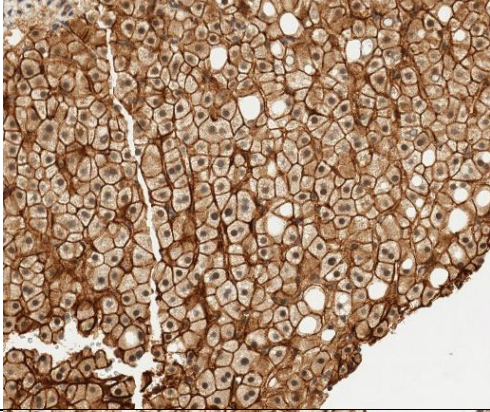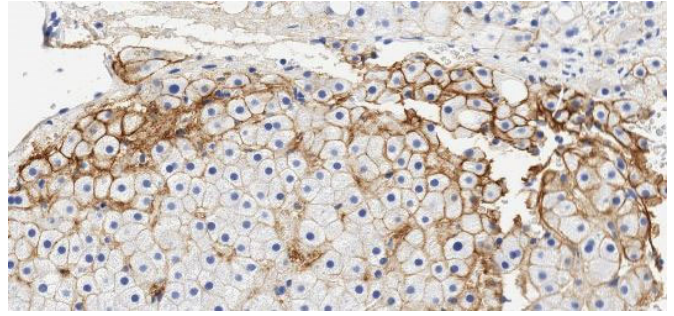

67

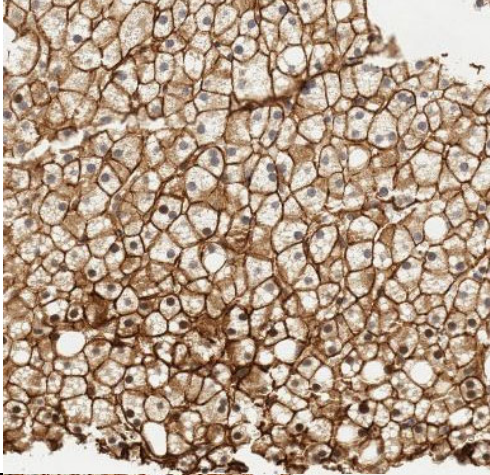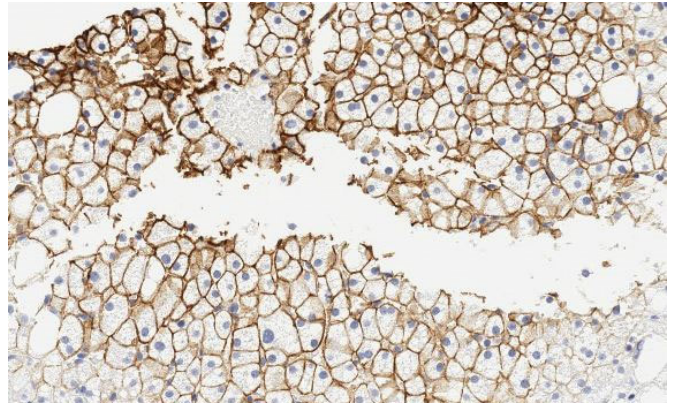

68

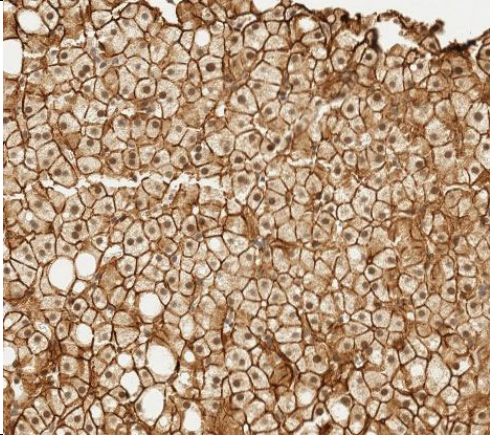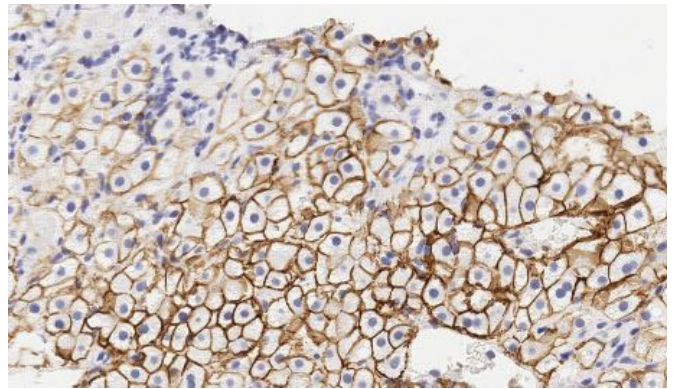



69

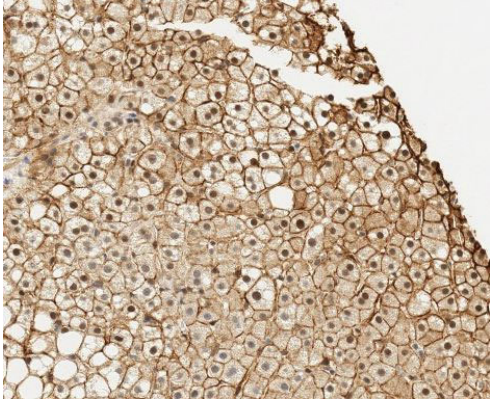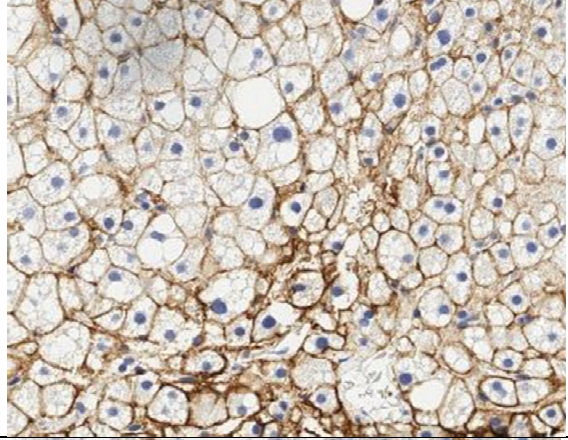

70

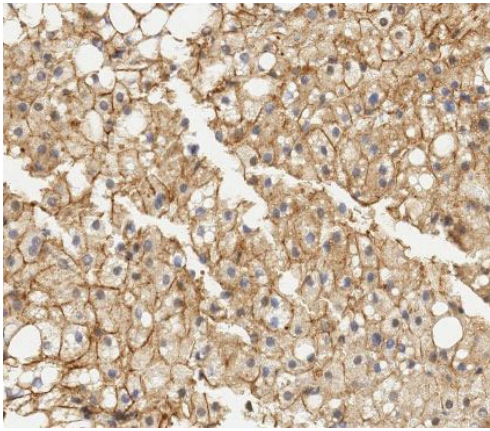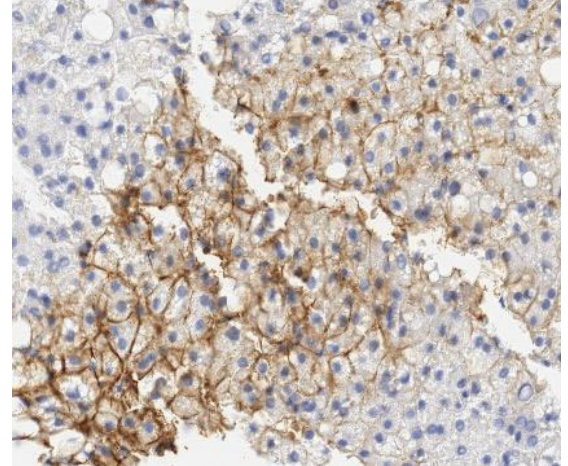

71

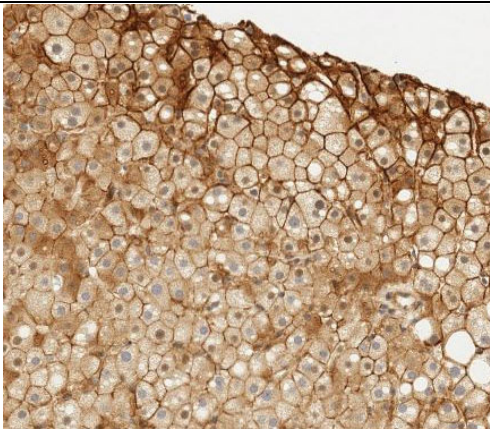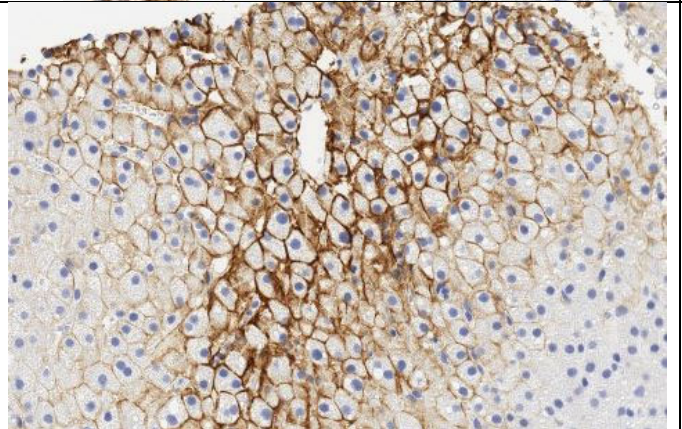



|    |                                                                                     |                                                                                      |
|----|-------------------------------------------------------------------------------------|--------------------------------------------------------------------------------------|
| 72 | 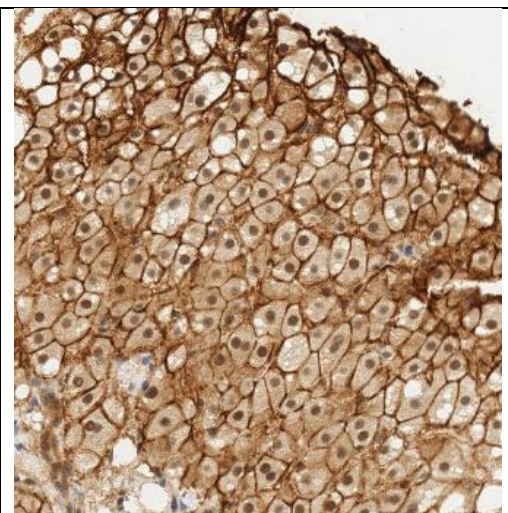   |    |
| 73 |   |   |
| 74 |  |  |
| 75 |  |  |



76

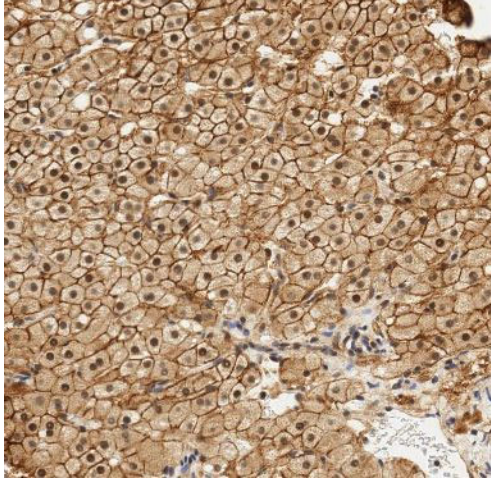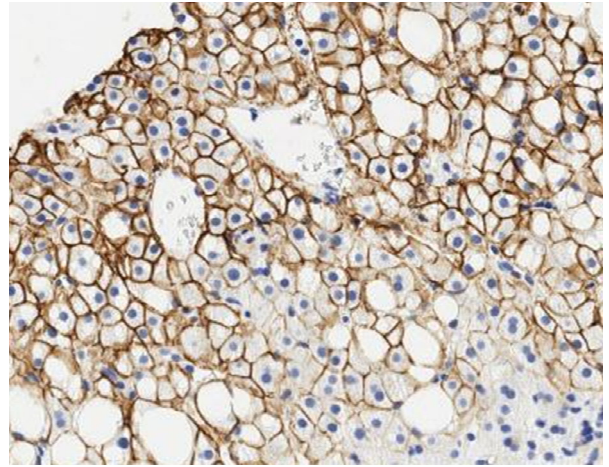

77

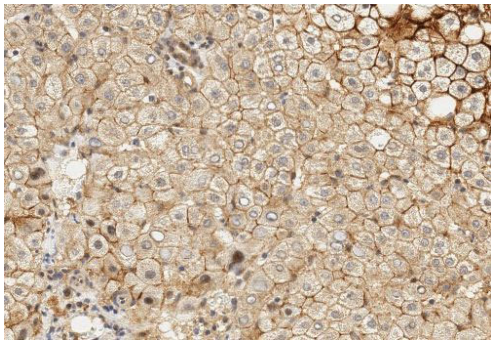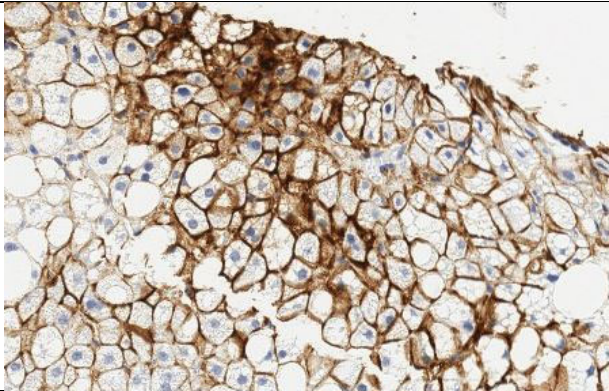

78

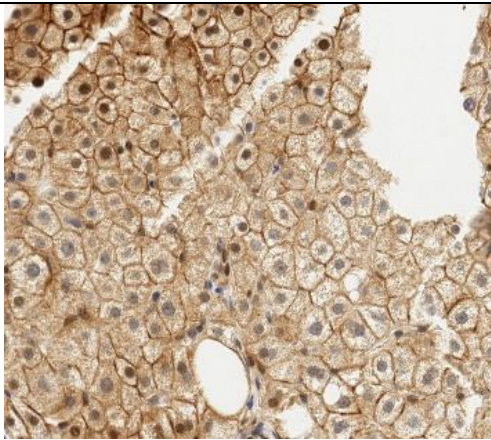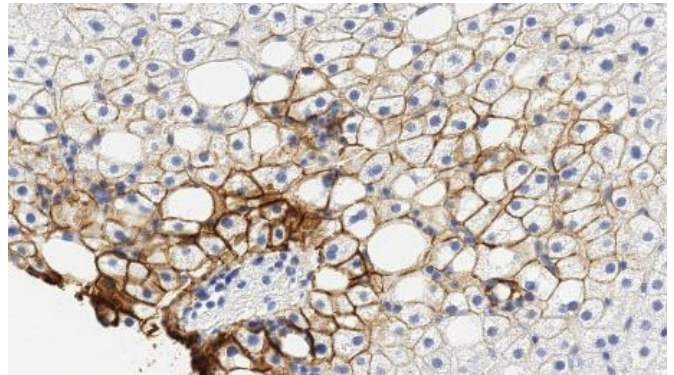



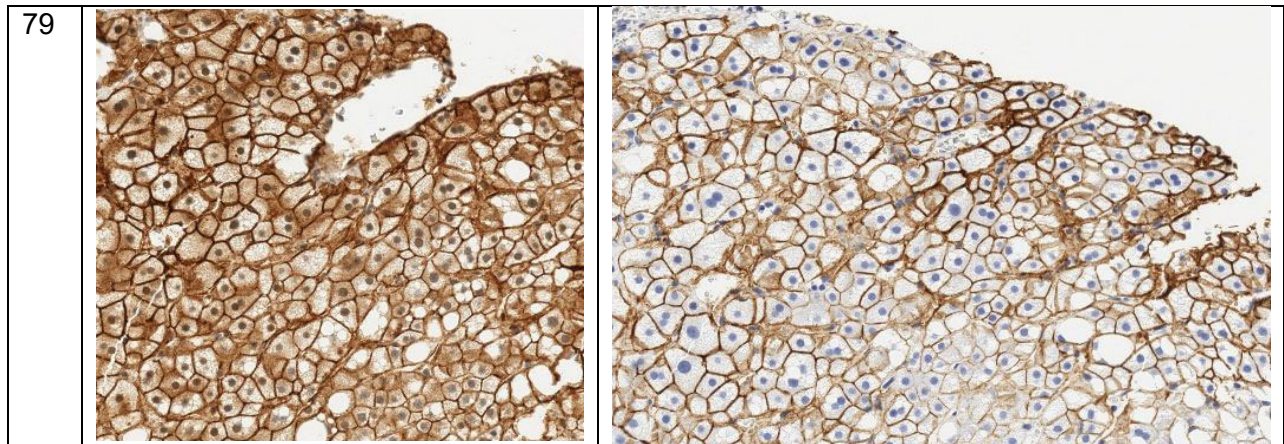

**Fig. S X. IHC of OATP1B1 and OATP1B3.** IHC of OATP1B1 (left) and OATP1B3 (right) staining are shown for each donor (n=79). Six liver cirrhotic tissues were labeled as LC. Thirteen HCV positive liver tissues were labeled as HCV. Eight normal liver tissues were labeled as NM. The two OATP1B1 c. 521 CC tissues were labeled as CC.

**Table S II Prediction of OATP1B1 transmembrane (TM) domains.** TM domains of OATP1B1 was predicted by Phobius (1) (<https://www.ebi.ac.uk/Tools/pfa/phobius/>) and TMPred (2) ([https://embnet.vital-it.ch/software/TMPRED\\_form.html](https://embnet.vital-it.ch/software/TMPRED_form.html)). The dashed area represents the 4<sup>th</sup> transmembrane domain. I indicates inner and O indicates outer orientation. The higher the probability or score, the confident the prediction is.

| Helix # | Phobius (Kall et al., 2004) |             |        |             | TMPred (Hofmann et al., 1993) |             |        |       |
|---------|-----------------------------|-------------|--------|-------------|-------------------------------|-------------|--------|-------|
|         | Begin - End                 | Orientation | Length | Probability | Begin - End                   | Orientation | Length | Score |
| 1       | 28 - 48                     | I - O       | 21     | 0.9980      | 25 - 48                       | I - O       | 24     | 1382  |
| 2       | 68 - 89                     | O - I       | 22     | 0.9900      | 65 - 88                       | O - I       | 24     | 1312  |
| 3       | 96 - 117                    | I - O       | 22     | 0.9998      | 96 - 121                      | I - O       | 26     | 2314  |
| 4       | 170 - 195                   | O - I       | 26     | 0.7984      | 169 - 196                     | O - I       | 28     | 607   |
| 5       | 207 - 230                   | I - O       | 24     | 0.9998      | 207 - 230                     | I - O       | 24     | 1861  |
| 6       | 258 - 279                   | O - I       | 22     | 0.9998      | 259 - 279                     | O - I       | 21     | 2142  |
| 7       | 337 - 356                   | I - O       | 20     | 0.9999      | 332 - 356                     | I - O       | 25     | 1899  |
| 8       | 376 - 395                   | O - I       | 20     | 1.0000      | 376 - 397                     | O - I       | 22     | 2402  |
| 9       | 407 - 428                   | I - O       | 22     | 0.9999      | 410 - 430                     | I - O       | 21     | 1792  |
| 10      | 534 - 560                   | O - I       | 27     | 0.9999      | 536 - 560                     | O - I       | 25     | 1491  |
| 11      | 572 - 595                   | I - O       | 24     | 0.9989      | 570 - 595                     | I - O       | 26     | 1192  |
| 12      | 624 - 646                   | O - I       | 23     | 0.9999      | 624 - 647                     | O - I       | 24     | 2056  |

## References

1. Kall L, Krogh A, Sonnhammer EL. A combined transmembrane topology and signal peptide prediction method. *J Mol Biol.* 2004;338(5):1027-1036.
2. Hofmann K, Stoffel W. TMbase - A database of membrane spanning proteins segments. *Biol Chem Hoppe-Seyler.* 1993;374:166.
